# Supplementary material for: Unveiling the Wheat NTP Gene Family: Insights from Genome-Wide Identification and TaNTP6 Haplotype Analysis
Source: Research Square preprint supplement (doi:10.21203/rs.3.rs-7526017/v1), 2025-09-22
Supplement: Supplementary file 1 [file 4b8ac31bbcfb5770c1b1aa3b.docx]

+
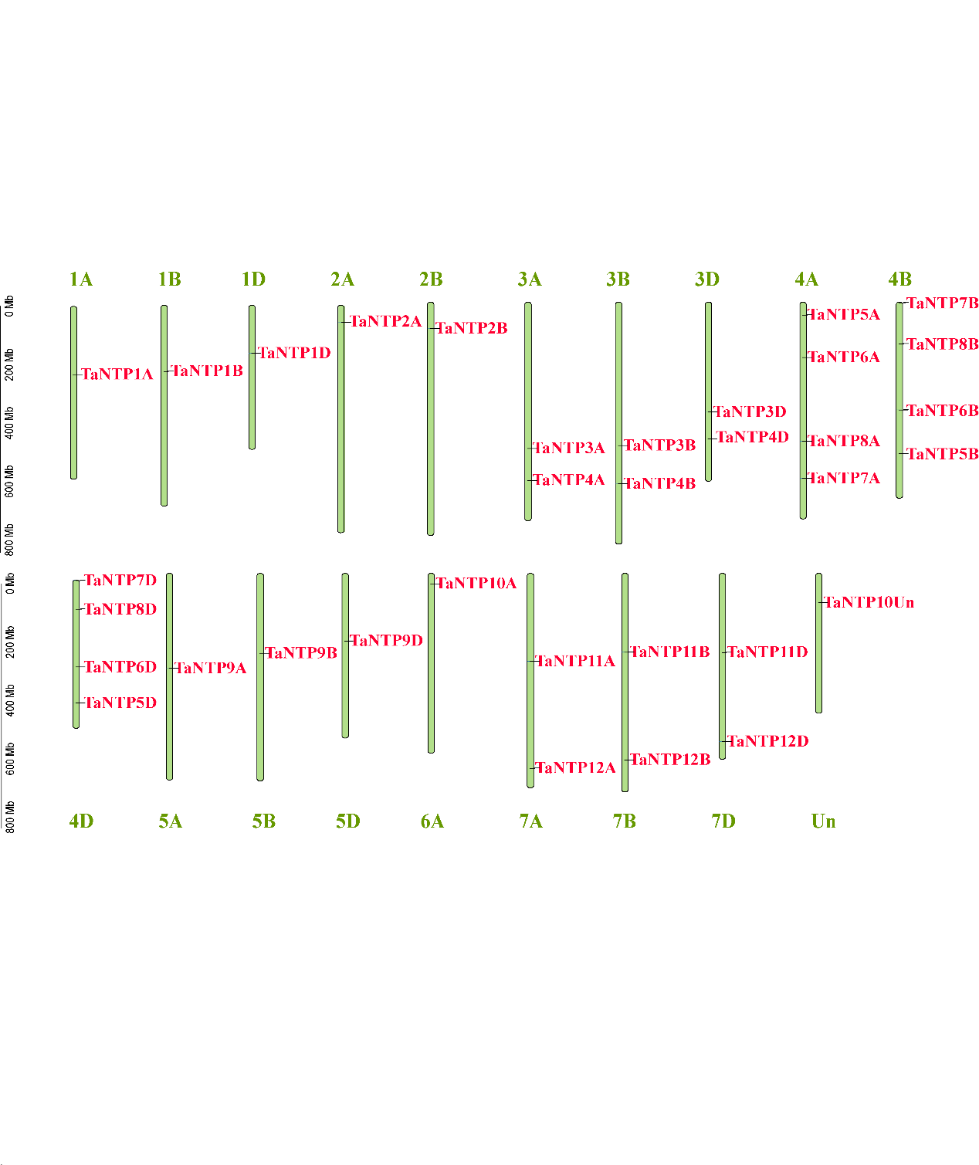


**Fig. S1.** **Distribution of the identified 34 *TaNTP* genes across the wheat genome.** Chromosomes without *TaNTPs* location were not present.
