# Supplementary material for: Unveiling the Wheat NTP Gene Family: Insights from Genome-Wide Identification and TaNTP6 Haplotype Analysis
Source: Research Square preprint supplement (doi:10.21203/rs.3.rs-7526017/v1), 2025-09-22
Supplement: Supplementary file 2 [file 84c7c88cbbc5c15235247bd0.xlsx]

## Sheet: Table S1
Table S1 Primer sequences used for subcellular localization vectors construction
Primer name	Sequence (5'-3')
TaNTP1A-F	CGGGGGACTCTTGACCATGGCCGACGCCTCTTCGGG
TaNTP1A-R	CTCCTTTACTAGTCAGATCTacTATTATAGCTCCCGCGGTACT
TaNTP3B-F	CGGGGGACTCTTGACCATGGAAGCCGCCGACGCGAGCT
TaNTP3B-R	CTCCTTTACTAGTCAGATCTacCCATCTGCTAATGTGCGTGTA
TaNTP4A-F	CGGGGGACTCTTGACCATGGtcATTGAACTTGCCCCCAAC
TaNTP4A-R	CTCCTTTACTAGTCAGATCTacGGTCTGATGTTGGCTGCTTCC

## Sheet: Table S2
Table S1 The sequences of NTPs protein in A. thaliana, O. sativa, and T. aestivum
Gene ID	Gene name	Sequence
AT2G39740	AtHESO1	MSRNPFLDPTLQEILQVIKPTRADRDTRITVIDQLRDVLQSVECLRGATVQPFGSFVSNLFTRWGDLDISVDLFSGSSILFTGKKQKQTLLGHLLRALRASGLWYKLQFVIHARVPILKVVSGHQRISCDISIDNLDGLLKSRFLFWISEIDGRFRDLVLLVKEWAKAHNINDSKTGTFNSYSLSLLVIFHFQTCVPAILPPLRVIYPKSAVDDLTGVRKTAEESIAQVTAANIARFKSERAKSVNRSSLSELLVSFFAKFSDINVKAQEFGVCPFTGRWETISSNTTWLPKTYSLFVEDPFEQPVNAARSVSRRNLDRIAQVFQITSRRLVSECNRNSIIGILTGQHIQESLYRTISLPSQHHANGMHNVRNLHGQARPQNQQMQQNWSQSYNTPNPP…
AT2G40520	AtNTP2	MADHKGKVPVSLSASSSSLSLSPKTTPIEAEVWLIAEARAQEILCAIQPNYLAERSRNKIISNLQTLLWERLGIEVYLFGSMPLKTYLPDGDIDLTVLTHHASEEDCARAVCCVLEAEMGNSDLQVTGVQYVQAKVKVIKCSIRDVAFDISFNQLAGLGALCFLEQVDKAFGRDHLFKKSIILVKAWCFYESRILGANSGLISTYALAILVLNIVNMSYSSLSGPLAVLYKFINYYGSFDWKNYCVTVTGPVPISSLPDITETGNHEVFLDEKFFRECMELYSGETGVVEASRKYFPVKYYNILDPLKHSNNLGRSVTKGNMVRLRNCFMLGVQKLRDVLTLPGENVGWKLEKFFNVSLERNGKGQRQDVEEPVVAFGTGAADYSQLKGDFDRYRNNLI…
AT2G45620	AtURT1	MADGGAEPPAPPSSINAGEFLLSILHGSPSPSSQGPQHHQSFALDPAIAAIGPTVNNPFPPSNWQSNGHRPSNHNPPSWPLAFSPPHNLSPNFLGFPQFPPSPFTTNQFDGNQRVSPEDAYRLGFPGTTNPAIQSMVQQQQQQQLPPPQSETRKLVFGSFSGDATQSLNGLHNGNLKYDSNQHEQLMRHPQSTLSNSNMDPNLSHHRNHDLHEQRGGHSGRGNWGHIGNNGRGLKSTPPPPPPGFSSNQRGWDMSLGSKDDDRGMGRNHDQAMGEHSKVWNQSVDFSAEANRLRGLSIQNESKFNLSQQIDHPGPPKGASLHSVSAADAADSFSMLNKEARRGGERREELGQLSKAKREGNANSDEIEDFGEDIVKSLLLEDETGEKDANDGKKDSKTS…
AT3G45750	AtNTP4	MGSRGNVAEDKNVSSKVIRKKVNNTVSIALKRYKIDSYILLDLDKVLNDVYCSFRPVSADYNTRKELVKNLNTMALDIYGKSEESSPVLEAYGSFVMDMYSSQSDLDVSINFGNGTSEIPREKKLEILKRFAKKLRSLQGEGQVKNVESIFSAKVPIVKFSDQGTGVECDLSVENKDGILNSQIVRIISQIDGRFQKLCLLVKHWAKAHEVNSALHRTLNSVSITLLVALHLQTQNPPILPPFSMLLKDGMDPPNVEKRAQKFLNWGQRNQESLGRLFATFFIKLQSVEFLWRQGLCVSVLNGLWISKKWKKVGVGSISVEDFTNISQNVARRVNGAGAKKIYSSINRTVEDIFEFLNDKVAGTDLRHRLFGKGSVVQIPPVAPLNGKTAGIHKVSGQQ…
AT3G45760	AtNTP5	MDFRKNQAGEKNVSSKGIQKKVKNTMSIASKRYNIDSYILLDLDKVLDDAYSSFRPVSADYNTRKELVKNLNAMAIDIFGKSEESSPVLEAYGSFAMNTFSSQKDLDVSINFSSGTSEFYREKKLEILTRFATKLRSLEGQGFVRNVVPILSARVPIVRFCDQGTGIECDLTVESKDGILTSQIIRIISQIDDRFQKLCLLIKHWARAHGVNNASHNTLNSISITMLVAHHLQTQSPPILPPFSTLFKDGIDPPIVEKRTQKFLNWGQRNQESLGRLFATFFIKVEDFTDVARNFARVFSDYGAEKIYSSINRTVDDILEFLNGKVAGEHLTQKLFSQQTVVEPIPPVSPQQPHKKRVCLEKGYRAVGGISHGREETHETSRGKRKRSGGNWGCRFSGG…
AT3G51620	AtNTP6	MAADLDDLEEESSSSLSPPLLPPPRSPLNQPELWMRVEEATREIIEQVHPTLVSEDRRRDVILYVQKLIRMTLGCEVHSFGSVPLKTYLPDGDIDLTAFGGLYHEEELAAKVFAVLEREEHNLSSQFVVKDVQLIRAEVKLVKCLVQNIVVDISFNQIGGICTLCFLEKIDHLIGKDHLFKRSIILIKAWCYYESRILGAFHGLISTYALETLVLYIFHLFHSSLNGPLAVLYKFLDYFSKFDWDSYCISLNGPVCLSSLPDIVVETPENGGEDLLLTSEFLKECLEMYSVPSRGFETNPRGFQSKHLNIVDPLKETNNLGRSVSKGNFYRIRSAFTYGARKLGQLFLQSDEAISSELRKFFSNMLLRHGSGQRPDVHDAIPFLRYNRYNAILPASNHF…
AT3G56320	AtNTP7	MGEIQERLSVSSSSSSSSSSLSLSTALPKGDSLPIDADSWMIAEERAHEILCTIQPALVSDRSRNEIIDYVRTLIMSHEGIEVFSFGSVPLKTYLPDGDIDLTVLTKQNMDDDFYGQLCSRLQNEERESEFHATDVQFIPAQVKVIKCNIRNIAVDISFNQTAGLCALCFLEQVDQLFGRDHLFKRSIILVKAWCYYESRILGANTGLISTYALAVLVLYIINLFHSSLSGPLAVLYKFLDYYGSFDWNNYCISVNGPVPISSLPELTAASPENGHELLLDEKFLRNCVELYSAPTKAVDSNGLEFPIKHLNIVDPLKYSNNLGKSVTQGNVQRIRHAFTLGARKLRDVLSLPGDTMGWRLEKFFRNSLERNGKGQRQDVNDPVTAFGTGRSELSELSG…
AT3G61690	AtNTP8	MGEHESWAASPPSPSGLHPNGLLPGKAASVTRPLDAERWAKAEDRTAKLIACIQPNPPSEDRRNAVASYVRRLIMECFPQVQIFMFGSVPLKTYLPDGDIDLTAFSANQNLKDSWANLVRDMLEKEEKNENAEFHVKEVQYIQAEVKIIKCLVENIVVDISFNQIGGLCTLCFLEEVDHYINQNHLFKRSIILIKAWCYYESRILGAHHGLISTYALETLVLYIFYLFNNSFSGPLEVLYRFLEFFSKFDWQNFCLSLWGPVPVSSLPDVTAEPPRRDVGELRVSEAFYRACSRVYAVNIAPQEIQGQPFVSKHFNVIDPLRENNNLGRSVSKGNFFRIRSAFTLGAKKLTRLLECPKENLIHEVNQFFMNTWERHGSGRRPDAPGNDLWLSRLGDPEP…
AT4G00060	AtNTP9	MENRHLPSKFFSSASSMAQNQLIDSLTSHISLYHSHSSSSSMANTIPNPRSAILRWFSSLSVHQRLSHLTVVDPKFVQILLQMLGYIRTKGPCSFIILPDLPSSSDLPSLCFKKSRGLISRVSESNESERFVFDSTRLFGSGEGERAQDCSCSVNSLDSVVMAEEFLTNVDRFVETMDVLSDGAFLRGEESDLGSNWVELEWLKAKGYYSMEAFVANRLEVSMRLAWLNTNSGKRRGIKLKEKLNAAAAAANSYWRKKACVDWWQNLDAATHKKIWTCLFGKSAKSVIYEILREANQAQQGEMWLFNFASARKGRTDTSAVSFCDMILEPNSVPRKPITVASNLSGLYVLQEFASLLILCQNGLVPVHSVFFSSMGTITTLVDCILRKLRGFLMVISID…
AT5G53770	AtNTP10	MEDSDAKTEAPAFVYDTLPPLSFSDSNQSPPPTHEESHQYSVFRKEISDFPDDTTPVESATVDFFSLDVEGETTENGVEPVTPVVVASKKKSKKRKKDEEPRLESNWFSENSFSKIPMLQLHKEIVDFCDFLLPTQAEKAERDAAVESVSSVIKYIWPSCKVEVFGSYKTGLYLPTSDIDVVILESGLTNPQLGLRALSRALSQRGIAKNLLVIAKARVPIIKFVEKKSNIAFDLSFDMENGPKAAEFIQDAVSKLPPLRPLCLILKVFLQQRELNEVYSGGIGSYALLAMLIAFLKYLKDGRSAPEHNLGVLLVKFFDFYGRKLNTADVGISCKMGGSFFSKYNKGFLNRARPSLISIEDPQTPENDIGKSSFNYFQIRSAFAMALSTLTNTKAILSL…
Os01g44350	OsNTP1	MADQATALVLSFGSYHLGVHSRGSDIDVLVVGPSYVDRDFFGALAAALAETAAVAELQPPARARRARASDQDEVPRRAGGPRVRWRVGRRPRWTRAARASGTYGRRDAAGKGERHGQDSAGGAPAMDLRSPLPPRRRPPVLLSRRSPPHPSHAMPREKSERERDEEGREEGKRELTWMSDMWGPRGSHADSAATSDKIGSKPPKDLK
Os01g48210	OsNTP2	MARKARPAEPPTPGRKGRKPLPSHAPPTEAAAAAATAAASPAAATASPAADAMEAEAGGVAIVYDALPGLTLAFSPEEEEHLEGATADLGGASTSASAAVVEEVEDATAAYSVFRNEITAAGDALVDIPAADFFSLDVSAAVEDEPATPRALSPQPAPEATLSGSLAPAEQPAQGSERAWFRGGRRFRSPMLQLHKEILDFCDFISPSAEEQSSRTAAVKAVSNVIKHIWPQCKVEVFGSFRTGLFLPTSDIDVVIFDSRVKTPQVGLYALAKALSQKGVAKKIQVIAKARVPIVKFVERKSEIAFDISFDMDGGPQAADFIKDYVKKFPALRHLCMILKVFLHQRELNEVYTGGIGSYALLTMLITHLQLIWGGKDILGYRKKEHNLGILLIALFDFY…
Os01g62790	OsNTP3	MSIWRVPNYDVLEKCTEDILSLIKPVEGDRNKRIYAIQELADTIYSAGALRGDLDVSVELFNALNLPISKRKKQDTLREVRRALQKRGIARHMEFIPNARVPVLQYVSNQYGISCDISISNYPGRIKSKIFYWINTLDDRFGDMVLLVKEWAKAQNINDPKNGTLNSYSLCLLVLFHFQTCEPAILPPLKEIYEGNIMEDISDKISLWEYGLPVMDSDYLFVSALLFNCCIHIQGGRTIMRNILMRFAP
Os02g02970	OsNTP4	MVGGEPLRRRRHLADDGFFRFLLPSPKPATTTTTTPPPAALFVPPHRLIAPPVPLPQPPRPEERLFIVPPTRPSWLPPLSIPPPATATAPPPTRCPPRRMGNGGGGCFGGRSGVVGWRYGGFVGNGGRRGFERRRVGGGFIGAANAGEATGGERRAVVRKREKKVWVAVEKKGEDCGGGDEDQAAMGAGYAGGDERDEQVDVDDDEQDDGDGDDPFDVAADHDLLAVVADGAGSEKPMEQLGSPPDQPPPPPPRQRVGTRRWRVERRHDIDAFTPGLLSLYESLNPSEEHKAKQRQLIESLTNSVSKEWPNAQLHLYGSCANSFGNSHSDVDVCLQIDTAAEENIAELLLALAETLRKDDFDNVEAITSARVPIVKIADPGSGLSCDICVNNLFAVANT…
Os03g11240	OsNTP5	MVPNGLLPNASAGVTRRLDGERWAAAEVRTAELIARIQPNADSERRRRAVYDYVRRLITNCLSCQVFTFGSVPLKTYLPDGDIDVTAFSDSEELKDTWANLVRDALEHEEKSENAEFRVKEVQYIQAEVKIIKCLVDNIVVDISFNQVGGLCTLCFLEEVDALISQNHLFKRSIILIKAWCFYESRILGAHHGLISTYALETLVLYIFHVFNNCFTGPLEVLYRFLEFFSNFDWEKFCLSLSGPVPISSLPDMTAEPPRMDAAELLLSKSFLDKCSYAYAVTPRIQESQGQQPFVSKHFNVIDPLRTNNNLGRSVSKGNFFRIRSAFSFGAKRLAKLLECPKEDLIAEVNQFFTNTWIRHGSGNRPDAPTLGLVHQHHLKVVPAEASNSQRSAMALKKN…
Os03g21850	OsNTP6	MMAGGGGGGGGGTLAAAMARAAPGAAAIPAGAVARAEEAAGEVVRRVRPTEASERRRAAVVGYARRLVGTALGCEVFAYGSVPLKTYLPDGDVDLTVLGNTSYGSTLIDDIYHILQSEEQNCDAEFEVKDLQLINAEVRLIKCTIENIVVDISFNQTGGICALCFLELVDRKVGKNHLVKNSIILIKAWCYYESRLLGAHHGLISTYALETLILYIFNLFHKSLHGPLEVLYRFLEYFSKFDWDNYCISLNGPVALSSLPNQIVEATNTPGSDLLFDKEFLNNSVQKTDSNACNTEFRSKYLNIIDPLKEHNNLGRSVNKASFNRIRTAFSYGAQKLGQVLLLQPELIPDEIYGFFKNTLNRIGSGVRPDIGDESYNDAFRCESFLGPGKALWDEMSSM…
Os06g45800	OsNTP7	MASASASASPRTARQLADALTAHLSLYHAATPPPPSSSSPRAAILRWLASLSPPCRAAAATSLLTPAAAAALLSMLRRLRARGHSSFFVLHPPSPSSAAVAEEGAAAPTVLSRLSRGLLARAAEASRGQGLVFDHLLLFPSSPTSSSRLDAITVAEELLGDLDGFVAAMDEISGGRFLCGDGEVDLVAMVGEEFPELPWLKAKGYYVIEEFVANWVEIALRMSWAAAGGGGGGGGGGRKAVRVGKGVKEKAGLAANAFWREKGYVDWWMRLEPRVRARIMGAFFGKGTTALEIVYLKSNISNRSGDAIFFTKLMSAGTVADHILMKLRGILMVVSTESINLELIGDEAPKAAKKKDVEKISGGSRKGKKKSSSLKKLITSSKQMKDIGCSSSDSHDPKV…
Os07g48170	OsNTP8	MAAYRGRRDYGGGWWSASAGSGRMTLAAVMATRAPRPAFIRREAIRAAEAAADEVVLRVQPTEEAERTRQGIIGYLKLLFGTALGCEVFAFGSVPLKTYLPDGDIDITILGNTAPDSTFISEVRGILELEEQEDGADVAITGLQFIDAEVKLIKCVIDNIVVDISFNQIGGVTTLCLLELVDHEVGNDHLFKRSIMLIKAWCYHESHILGAHRGLISTYALEVLVLYIFNIFHKSLHSPLEVLYKFLEYFSKFDWDKYCISLNGPVPLSSLPNLTGESYSVEPSGIHDELLFGPNGSCDRLIVLKKDSDGSNMNFRPKYLNIIDPIKSSNNLGRSVSKGSFYRIRGAFSFGAQNLSQILMLPTDLIPTEIFGFFVNTLKSHGRGKRSDVGNNGSFEPSL…
Os08g44560	OsNTP9	MAAAASPPVPSKVDASSRPDRSPRPQSLEISWDSQALCKRAESCELEAEVPSINPTLLPVLEDLLIELYAILRPKPDDYEQRHLMIDVFNKIAEEIYGKKKGFPVVEAFGSFTMDLFTSKSDLDLSVNFNADFHSQFARKDKISVIRNLAKVLYAHQRNGRCHGVLPVVTAKVPVLKVIDKGTGVECDISVENKDGMSRSMIFKLISSIDERFQILCYLMKFWAKAHDVNCPRDRTMSSMAIISLVAFHLQTRRPPILPAFSALLKDGPDFPSIQRNVSLVEGFGSRNKESVAELFVSLMSKLLSVEGLWEQGLCASNFEGSWIFKTWERGVGNLSVEDFLDRSQNFARAVGKEEMQKISECIRVAVLNLNNFFRGKIDAPKLKNLLFEPPHQDELISN…
Os10g11034	OsNTP10	MSIFESLVPSDEEISKQKQLLATLSRLINKEWPNSKLYLYGSCANSFGFSNSDIDLCLSIDEKEMSKVDIILKLAHILHAGNLRNIQALTRARVPIVKLMDPNTGLSCDICVNNLLAVVNTKLLRDYSRIDKRLRPLAFIVKHWAKSRCVNETYQGTLSSYAYVIMCIHYLQSQRILPCLQEMEPTYYVTVDNNICAYFDQVDKLNGFGAQCKDTLSRLLWGFFRYWAYAHNYTKDVISIRTGRTISKNMKDWTRRIGNDRHLICIEDPFETSHDLGRVVDNRSIWALREEFERAAEILHLDPNPSITLFEPYVPSEAET
Os11g02320	OsNTP11	MVDNQGCSPALEPVPTPPNPDPSSISPEAWDPLEAAAGAVVARIQPNPPSEDRRAAVIAYVQHLLRCTVGCQVFPFGSVPLKTYLPDGDIDLTAFGHSSDEILAKQVQAVLESEEARKDAEFEVKDVQYIHAEVKLVKCIVQNIIVDISFNQFGGLCTLCFLEKVDQKFEKYHLFKRSIMLIKAWCYYESRILGAHHGLISTYALEILVLYIFHLFHGTLDGPLAVLYRFLDYYSKFDWDNKGISLYGPISLSSLPELVTDSPDTVNDDFTMREDFLKECAQWFTVLPRNSEKNTQVFPRKFFNIVDPLKQSNNLGRSVSKGNFLRIRSAFDFGARKLGKIIQVPDNFTMDEVNQFFRNTLKRHCSRVRPDVQEIALDFNGERADNDSSPLYSNNSFGD…
Os12g02260	OsNTP12	MLIKAWCYYESRILGAHHGLISTYALEILVLYIFHLFHGTLDGPLAVLYRFLDYYSKFDWDNKGISLYGPISLSSLPELVTDSPDTVNDDFTMREDFLKECAQWFTVLPRNSEKNTQVFPRKFFNIVDPLKQSNNLGRSVSKGNFLRIRSAFDFGARKLGKILQVPDNFTVDEVNQFFRNTLKRHCSRVRPDVQEIALDFNGERADNDSSPLYSNNSFGDLSDEFNNISISDSSNHGSLRQNGWNYVAENKERKSVSGGWLASKATNPAATNSTGMTNGSDSCEPASPSITGAHSLPSEEGHDALDLFNESESGTKAGIKYDTNPSHHGMSTVSYAGRSHQSFEEVDNDDRGTIDSNWSDLTGDYTTNFNNLLYAQGFHQDYPMNQYYPFGPVYYQMPS…
Os12g18530	OsNTP13	MAYCEAGGPVGRSPPSGSGGGGRRKTLAEVMATRTPRPASIRPEATRAAEAAAREVLLRVAPTEEAERRRQDVVGYLRRLLGTALGCEVIAFGSVPLKSYLPDGDVDITVLGNTALDGACISDVHSILESEEQDSGAELEIKGLHFIDAEVKLIKCVIENIVVDISFNQIGGVSTLCFLELADRKVGKNHLFKRSIMLIKAWCYHESRILGAHHGLLSTYALETLVLYIFNIFHKSLHGPLEALYKFLEYFSKFDWDKYCISLNGPVLLSSLPSPAVEPSSIQDELLFGKKTLPEVSDGSNINFCLKHLNIIDPLKWSNNLGRSVSRGSFYRIRGALSFGAQKLGQILMLHSDLIPTEIFGFFANTLKRHGRGERSDVGNNDSIESLLDPEYALGKDAP…
TraesCS1A02G139400	TaNTP1A	MADASSGGGGRAPRPSTSPSDAKLEPSASASLDGGLLLRLLQNPSPRPQQQQNPVQPLAEPNNFFVDPAVAAVGLMFSSPPYVHVGGFAWPSSSSPQPQLRSSDPRIAQPLDPYAERVGGGFRSVDVVSRNRPEKPRSGAPPPGFGKPSPPKFATAWHSATGREVHDVFGAMQQNRERQREPNYHHPKGFGRTHNSENQEMPTFTGGQGVLGRLPHEERSTSLIIGSRGPAAVMMYREQQQQQHDHILSRTPPDANASANAHGITGRIPHGDQHILQFAGGRTLIGEHHIHPSTGARIPHKGQRQQETCLADISQGDQRWQGHASRNLSAGTVLEMLGKMPMKEKHQVTAPSSSSVDMDVRGDRGKKFLAEATGLEVGVGEVGFEHGVHGRVVVDARNF…
TraesCS1B02G149800	TaNTP1B	MHAVEDALTTTQERHRGAPTPPPPFPMADASSGGGGRAPRPSTSPSDPKLEHSASASLDGGLLLRLLQNSSPRPQHQQNPSQPLAKPNNFFVDPAVAAVGPMFSSPPYVHVGGFAWRSSSSPQPQLGSSDPRIAQPLDPYAERGGGGFRSVDVVSRNRPEKPRSGAPPPGFGKPSPPKFATAWHSATGREVHDVFGAMQQNREQQREPNYHHPEGFGRTHNTEIQEMPTFTGGQGVLGRLPHEERNTSLIIGSHGPAAVMMYREQQQQQHDHILSRTPPDANASANAHGITERIPHGDQHILQFAGGRTLIGEHHIHPSTGARIPHKGQRQQEPCLADISQRDQRWQGHASLNLSAGIVLEMLGKMPMKEKHQVTAPSSSSVDMDVRGDRGKKFLAEST…
TraesCS1D02G133800	TaNTP1D	MADASSGGGGRAPRPSTSPSDAKLEPSASASLDGGLLLRLLQNPSPRPQQQQNPVQSLAEPNNFFVDPAVAAVGPMFSSPPYVHVGGFAWPSSSSPQPQLRSSDPRIARPLDPYAERGGGGFRSVDVVSRNRPEKPSSGAPPPGFGKPSPPKFATAWHSATGREVHDVFGAMQQNRERQREPNYHHPKGFGRTHNSENQEMPTFTGGQGVLGRLPHEERNTSLIIGSRGPAAVMMYREQQQQQHDHILSRTPPDANASANAHGITGRIPYGDQHILQFAGGRTLIGEHHVHPSTGARIPHKGQRQQEPCLADISQGDQRWQGHASRNRSAGTVLEMLGKMPMKEKHQVTAPSSSSVDMDVRGDRGKKFLAEATGLEVGAGEVGFERGVHGRVVVDARNF…
TraesCS2A02G105800	TaNTP2A	MASSYPARPNHRGSGVHNYGGGGRGHNGGHGHGHQYNGNGGGRGGRGGHHHRWNDYGRGGHHGYGYGGGHHQHQGYGYGGGQHQGYGYGGGHNGYGYGYGGGGDGMFHHNYGVQPYGVGLSHPLPAPAPAPMPVPPASHPHAQGPGWVPVPVPEEQPRPRRIMLMAPRRRPPVIPPPLRAAEAAAREVVLRLHPTEEAERRRHKVIDYAKNLIGTTFGCEVFPFGSVPLKTYLPDGDVDITIITNTNLDDSFVQDVCCLLAAEQSSDDAEFALRDIQVINAKVKIIKCVIDNLVMDISFNQVGGVSTLCFLELVNKEVGKDHLFKRSIILIKAWCYHEGNIHGSNHWLMSTYALEVLILYIFNLFHSSIHGPLQALYKFLLYYSKFDWDNQCLTLAGPV…
TraesCS2B02G122800	TaNTP2B	MASSYPSRPNHRGGGVHNHGGGGRGHNGGHGYGHHYNGNGGGRGGRGGHHHRWNDYGRGGHHHGYGYGGGHHQQQGYGYGGGGHHAYGYGYGGGGDGMFHHNYGVPGYGMGPSRPLPVPPTSHPHAPGVAPAPAPSTSHPHAPGPGLVPDERPRWITLMAPRRRPPVIPPPLRAAEAAAREVVLRLHPTEEAERRRHKVIDYAKNLIGTTFGCEVFPFGSVPLKTYLPDGDVDITIITNTNLDDSFVQDVCCLLATEQSSDDAEFALRDIQVINAKVKIIKCVIDNLVMDISFNQVGGVSTLCFLELVNKEVGKDHLFKRSIILIKAWCYHEGNIHGSNHWLMSTYALEVLILYIFNLFHSSIHGPLQALYKFLLYYSKFDWDNQCLTLNGPVPLRNDA…
TraesCS3A02G272100	TaNTP3A	MEAAEASSQACVYDALPGLTLDFSPEEDLDAPEPRSPSYPAAAEEDATATYAVFRNEITAAGDPLVDIPAADFFSLDVSGAVRAEPASPSSVVARPAAAATPSSSLAPTEQPAQGSERAWFRGGRRFRSPMLQLHKEILDFCDFISPSAEEQSSRTAAVQAVSDVVKHIWPHCKVEVFGSFRTGLYLPTSDIDVVVFETRAKTPQGLYALAKALSQKGVAKKIQVIAKARVPIVKFMERISGIPFDISFDIDGGPQAADFIKDAIKKMPALRPLCMILKVFLHQRELNEVYTGGVGSYALLTMLITHLQGVKDMLGYRQSKEHNLGILLIKFFDFYGRKLNYTDVGISCNSARTFFLKSDKDFVNLDRPHLIAIQDPMVPDNDIGKNSFNYFKVKSAFL…
TraesCS3B02G305800	TaNTP3B	MEAADASSQACVYDALPGLTLDFSPEEDLDAPEPRSSSYPAAAEEDSTATYAVFRNEITAAGDPLVDIPAADFFSLDVSGAVRGEPASPSSVAARPAAAATPSSSLAPTEQPAQGSERAWFRGGRRFRSPMLQLHKEILDFCDFISPSAEEQSSRTAAVQAVSDVVKHIWPHCKVEVFGSFRTGLYLPTSDIDVVVFETRAKTPQGLYALAKALSQKGVAKKIQVIAKARVPIVKFVERISGIPFDISFDIDGGPQAADFIKDAIKKMPALRPLCMILKVFLHQRELNEVYTGGVGSYALLTMLITHLQLIWGVKDMLGYRQSKEHNLGILLIKFFDFYGRKLNYTDVGISCNSARTFFLKSDKDFVNLDRPHLIAIQDPMVPDNDIGKNSFNYFKVKS…
TraesCS3D02G271700	TaNTP3D	MKTTNLSGPLLQSNQSPSDDQSSDQMPRKAKAAEPTRRSKGKRVHPTQAAAATTAAAVMEAAEASSQACVYDALPGLTLDFSPEEDLDAPEPLSSSYPAAAAAAEEDATATYAVFRNEITAAGDPLVDIPAADFFSLDVSGGVRAEPASPSSVAARPAAAATPSSSLAPTEQPAQGSERAWFRGGRRFRSPMLQLHKEILDFCDFISPSAEEQSSRTAAVQAVSDVVKHIWPHCKVEVFGSFRTGLYLPTSDIDVVVFETRAKTPQGLYALAKALSQKGVAKKIQVIAKARVPIVKFVERISGIPFDISFDIDGGPQAADFIKDAIKKMPALRPLCMILKVFLHQRELNEVYTGGVGSYALLTMLITHLQLIWGLKDMMGYRQSKEHNLGILLIKFFDF…
TraesCS3A02G362300	TaNTP4A	MIELAPNNDVLEKCIKDILSQIKPADDDLNKRLSAIKELEVSMQPVAALKGAAAKPFGSFLSNLYSKSGDLDISVQLMNSSNLPINKKKKISILKAVRTALQRGGVYGYMEFIPQARVPVLQYVSNRFGISCDLSVDNYPGRIKSKIFYWISTLDERFGDMVLLIKEWAKAQNINDPKSGTLNSYSLCLLVLFHFQTCEPAILPPLEDIYEGNITEDFADMTLYNEEHLDEVCAANIAKFQSQNKEQRNESSLCHLLATFFHKFCHIDSLSSDVISTYTGQFKKIQDIPILRKKPYSLFVEDPVERPDNAARAVGERGLLLIASAFSDAKNKLASLEHTDRNDLLAMLSTPGVCSKLGGRVIANNYTNTPQRTRQHVINVGAKVSNNQPRLRAKGFTGS…
TraesCS3B02G394900	TaNTP4B	MPCPIGFSMVELVQNYDVLEKCTKDILSIIKPTEADQNKRLHAIQEIVDSIYLVGRLGDAAVKPFGSFLSKLYAKSGDLDVSVELPNVLGFPTSKEKKQSLLGELMRALEVRGVSRDVNFIPTARVPVLQYVSNHFGVSCDISIDNYPGGLKSKVLYWINTLDGRFGDMVLLVKEWAKAQNINDPKDGTLNSYSLCLLVLFHFQTCKPAILPPMNEFLDVNISAESGPYNEKNLDEMCAESIAKFRRRDIGQRNQSSLSHLLATFFEKFCRLGVHSSDHVISTYMGRLQRKQGGLYWMTKSCYLFVEDPFQRLDNAARTVDVLGLHDIATALKNAKNIVSSDGPVDRNEFLSLLCTPEVGSKLGARATAGRYATPATTLQEDRFRGFLERLAANPFDNQ…
TraesCS3D02G356000	TaNTP4D	MIELVPNNDVLEKCIKDILSQIKPAEDDLNRRLSAIKELEVSMQPVAVLKGAAAKPFGSFLSNLYSKSGDLDISVQLMNSSNLPINKKKKISILKAVRTALQKGGVYGYMEFIPQARVPVLQYVSNRFGISCDLSVDNYPGRIKSKIFYWISTLDERFGDMVLLIKEWAKAQNINDPKSGTLNSYSLCLLVLFHFQTCEPAILPPLEDIYEGNITEDFADMTLYNEEHLDEVCAANIAKFQSQNKEQRNESSLCHLLETFFHKFCHIDSLSSDVISTYTGQFKKIQDIPIRRKKPYSLFVEDPVERPDNAARAVGERGLLLIASAFSDAKNKLASLEHTDRNDLLAMLSTPGVCSKLGGRVIANNYTNTPQRTRQHLINVGAKVSNNQRRPRAKGFTGS…
TraesCS4A02G052700	TaNTP5A	MAMVPNGLLPNASAGVTRRLDPDRWAVAESRTAELIARIQPNAYSEGRRHAVYNYVQRLIMNCLSCQVFTFGSVPLKTYLPDGDIDVTAFSNSEELKDTWANLVRDALEREEKSENAEFCVKEVQYIQAEVKLIKCLVDNIVVDISFNQVGGLCTLCFLEQVDSLINQNHLFKRSIILVKAWCFYESRILGAHHGLISTYALETLVLYIFHVFNNCFTGPLEVLYRFLEFFSNFDWEKFCLSLWGPVPISSLPDMTAEPPRMDTGELLLTKAFLDRCNHLYGVMPRTQENQGQPFVSKHFNVIDPLRANNNLGRSVSKGNYFRIRSAFSFGAKRLAKLLECPNEDLIAEVNQFFTNTLTRHGSGNRPDAPTPNLFPKHALKVVPAEASNSHENATMPKK…
TraesCS4B02G251600	TaNTP5B	MAMVPNGLLPNASAGVTRRLDPDRWAVAESRTAELIARIQPNAYSEGRRHAVYNYVQRLIMNCLSCQVFTFGSVPLKTYLPDGDIDVTAFSNSEELKDTWANLVRDALEREEKSENAEFCVKEVQYIQAEVKLIKCLVDNIVVDISFNQVGGLCTLCFLEQVDNLINQNHLFKRSIILVKAWCFYESRILGAHHGLISTYALETLVLYIFHVFNNCFTGPLEVLYRFLEFFSNFDWEKFCLSLWGPVPISSLPDMTAEPPRMDTGELLLTKAFLDRCNHLYGVMPRTQENQGQPFVSKHFNVIDPLRANNNLGRSVSKGNYFRIRSAFSFGAKRLAKLLECPNEDLIAEVNQFFTNTLTRHGSGNRPDAPTPNLFPKHALKVVPAEASNSHENATMPKK…
TraesCS4D02G252000	TaNTP5D	MAMVPNGLLPNASAGVTRRLDPDRWAVAESRTAELIARIQPNAYSEGRRHAVYNYVQRLIMNCLSCQVFTFGSVPLKTYLPDGDIDVTAFSNSEELKDTWANLVRDALEREEKSENAEFCVKEVQYIQAEVKLIKCLVDNIVVDISFNQVGGLCTLCFLEQVDNLINQNHLFKRSIILVKAWCFYESRILGAHHGLISTYALETLVLYIFHVFNNCFTGPLEVLYRFLEFFSNFDWEKFCLSLWGPVPISSLPDMTAEPPRMDTGELLLTKAFLDRCNHLYGVMPRTQENQGQPFVSKHFNVIDPLRANNNLGRSVSKGNYFRIRSAFSFGAKRLAKLLECPNEDLIAEVNQFFTNTLTRHGSGNRPDAPTPNLFPKHALKVVPAEASNSHENATMPKK…
TraesCS4A02G136000	TaNTP6A	VFVFGSVPLKTYLPDGDIDLTVIGNTSCGSTLIDDVYYILGSGEENGDAEFEVKDLEHIDAEVRLIKCTIGNIIVDISFNQTGGICAVSFLELVDRKVGKNHLFKRSIILIKGWCYYESRLLGAHHGLISTYALETLILYVFNLFHKSLHGPLEVLYRFLEYFSKFDWDKYCICLNGPVALSSLPNLIVEGLNVPSDDLLFDKEFLENSVQKASAPPRNSDARYSKFRVKCLNIIDPLKECNNLGRSVNRANFHRIRTAFSFGARKLGQILMLPPELIPDDIFAFFKNTLERNENGVRSDIDHVGAFHCQPFLGPSNQLLDGMSCMQISYKEEEKSRPRVSKKLAEHAVSVRINVPTQGGCFSGDDSFAPSTDLSARLSHCVRHEPNDHAYVFHENRNY…
TraesCS4B02G168900	TaNTP6B	MAPGGGGALPAVMARDVPGPAAIPAAAMASAEVAAAEVVRRVQPTEASERRRAEVVHYARRIVGTALGCEVFVFGSVPLKTYLPDGDIDLTVIGNTSCGSTLIDDVYYILGSGEENGDAEFEVKDLEHIDAEVRLIKCTIGNIIVDISFNQTGGICAVSFLELVDRKVGKNHLFKRSIILIKGWSYYESRLLGAHHGLISTYALETLILYVFNLFHKSLHGPLEVLYRFLEYFSKFDWDKYCISLNGPVALSSLPNLIELVSLAVEGLNVPGDDLLFDKEFLENSVQKASAPPRNSDARCSKFRVKCLNIIDPLKECNNLGRSVNRANFHRIRTAFSFGAWKLGQILMLPPELIPDDIFAFFKNTLERNENGVRSDIDHVGAFHCQPFLGPSNRLLDGM…
TraesCS4D02G171200	TaNTP6D	MAPGGGGALPAVMARDVPGPAAIPAAAMASAEVAAAEVVRRVQPTQASERRRAEVVDYARRIVGTALGCEVFVFGSVPLKTYLPDGDIDLTVIGNTSCGSTLIDDVYYILGSGEENGDAEFEVKDLEHIDAEVRLIKCTIGNIIVDISFNQTGGICAVSFLELVDRKVGKNHLFKRSIILIKGWCYYESRLLGAHHGLISTYALETLILYVFNLFHKYLHGPLEVLYRFLEYFSKFDWDKYCISLNGPVALSSLPNLIVEGLNVPGDDLLFDKEFLENSVEKASAPPRNSDARCSKFRVKCLNIIDPLKECNNLGRSVNRANFHRIRTAFSFGARKLGQILMLPPELIPDDIFAFFKNTLERNENGVRSDIDHVGAFHSQPFLGPSNQLLDGMSCMHMS…
TraesCS4A02G311100	TaNTP7A	MATPAAAPPPFSDATSYSDSGSDGSGDSEEEASPMVWDSQDLRAQAERNEEQLLAAMSVDPGRLPALNDLLLEVYAVLRPKPVDYQQRNALVDVFNKMATRIFGNDNGFPVVQAFGSFTMDLFTPKSDLDLSVNFSADIEDQCPRKKKMKVVRKFAKVLYSLQRDGIYCGVLPVVSAKVPIVNVIDRGTGIECDITVENKDGMTRSMIVKLISSLDERFQILSYLVKTWAKIHDVNSPTAQTMSSMSIISLVAFHLQTRHPPILPAFSALLKDGSDFASVEKNISLFKGFGSANKESVAELFVTLMSKLLSVESLWEHGLCASNFEASWISKTWKKGVGNLSVEDFLDRSQNFARAVGKAQMQKICTCLVVCASNLTDFMKGHIDASKLKTRLFGRLNP…
TraesCS4B02G003200	TaNTP7B	MDTPAAAPPPPPPFSDASDATSYSDSGSGSGSGGSGDSEEEASSRVWDSQDLRAQAERNEEQLLAAMSVDPARLPALNDVLLEVYAVLRPKPADYEQRNALVDVFSKMATRIFGNDNGFPVVQAFGSFTMDLFTPKSDLDLSVNFSAEIEDQCPRKKKMKVVRKFAKVLYSLQRDGIYCGVLPVVSAKVPIVNVIDRGTGIECDITVENKDGMTRSMIIKLISSLDERFQILSYLVKTWANIHGVNSPTAQTMSSMSIISLVAFHLQTRHPPILPAFSALLKDGSDFASVEKNISLFKGFGSTNKESVAELFVTLMNKLLSVESLWEHGLCASNFEASWISKTWKKGVGNLSVEDFLDRSQNFARAVGKTQMQKICTCLVVCASNLTDFMKGHIDASKL…
TraesCS4D02G002900	TaNTP7D	MEWRAMATPAAASPPPPPPFSDATSYSDTDSGGSGDSEEEASSMVWDSQDLRGRAEHNEEQLLAAMSVDPGRFPALNDLLLEVYAVLRPKPTDYEQRNALVDVFSKMATRIFGNDNGFPVVQAFGSFTMDLFTPKSDLDLSVNFSAEIEDQCPRKKKMKVVRKFAKVLYSLQRDGIYCGVLPVVSAKVPIVNVIDRGTGIECDVTVENKDGMTRSMIIKLISSLDERFQILSYLVKTWAKIHDVNSPTAQTMSSMSIISLVAFHLQTRHPPILPAFSALLKDGSDFASVEKNISLFKGFGSANKESVAELFVTLMSKLLSVESLWEHGLCASNFEASWISKTWKKGVGNLSVEDFLDRSQNFARAVGKTQMQKICTCLVVCASNLTDFMKGHMDVSNLK…
TraesCS4A02G194700	TaNTP8A	MVDIHECAVVLVQEPDHAAAAAANPDPSSISASAWRPFEDAAAAVVGRIQPSVSSEDRRAAVVHYVQRLIRCSVGCEVFPFGSVPLKTYLPDGDIDLTAFGSTSSDENLANEVRAVLESEELRKDAEFEVKDVQYIHAEVKLVKCLVQNIVVDISFNQIGGLCTLCFLEQVDERFGKKHLFKKSIMLIKAWCYYESRILGAHHGLISTYALEILVLYIFHLFHKSLDGPLAVLYRFLDYYSKFDWDNKGISLYGPVPLSSLPELVSEAPDTHDVDFLKREEFLKECAQRFTVPPRNFERNTRLFSRKFLNIVDPLKQNNNLGRSVSKGNFYRIRSAFDLGARKLGKILQVPINSAVPEVNQFFRNTLKRNHTMVRPDVQDIALDFNIERDNKGLDRNSF…
TraesCS4B02G120600	TaNTP8B	MVDIHECAVVLVQEPDHAAAAANPDPSSISAHAWRPFEDAAAAVVGRIQPSVSSEDRRAAVVHYVQRLIRCSVGCEVFPFGSVPLKTYLPDGDIDLTAFGSTSSDENLANEVRAVLESEELRKGAEFEVKDVQYIHAEVKLVKCLVQNIVVDISFNQIGGLCTLCFLEQVDERFGKKYLFKKSIMLIKAWCYYESRILGAHHGLISTYALEILVLYIFHLFHKSLDGPLAVLYRFLDYYSKFDWDNKGISLYGPVPLSSLPELVSEAPDTHDVDFLKREEFLKECAQRFTVPPRNFERNTRLFSRKFLNIVDPLKQNNNLGRSVSKGNFYRIRSAFDLGARKLGKILQVPINSAVPEVNQFFRNTLKRNHTMVRPDVQDIALDFNVERDNKGCSPLDRN…
TraesCS4D02G118600	TaNTP8D	MVDIHECAVVLVQEPDHAAAAANPDPSSISAHAWRPFEDAAAAVVGRIQPSVSSEDRRAAVVHYVQRLIRCSVGCEVFPFGSVPLKTYLPDGDIDLTAFGSTSSDENLANEVRAVLESEELRKDAEFEVKDVQYIHAEVKLVKCLVQNIVVDISFNQIGGLCTLCFLEQVDERFGKKHLFKKSIMLIKAWCYYESRILGAHHGLISTYALEILVLYIFHLFHKSLDGPLAVLYRFLDYYSKFDWDNKGISLYGPVPLSSLPELVSEAPDTHDVDFLKREEFLKECAQRFTVPPRNFERNTRLFSRKFLNIVDPLKQNNNLGRSVSKGNFYRIRSAFDLGARKLGKILQVPINSAVPEVNQFFRNTLKRNHTMVRPDVQDIALDFNVERDNKGCSPLDHN…
TraesCS5A02G147600	TaNTP9A	MVGIDECSVALVPEVEHALANPDPSSISPDAWAPFEAAALGVMCRIQPTVASEGRRAAVVDYIQRLVKCSVGCSVFPFGSVPLKTYLPDGDIDLAAFGYTCSDESLANEVRAILESEERRKDAEFEIKDVQYINAEVKLVKCFVQNIVVDISFNQIGGLYTLCFLEQVDQRFEKTHLFKRSIVLIKAWCYYESRILGAHHGLISTYALETLVLYIFHLFHESLDGPLAVLYRFLDYYSKFDWDNRAISLHGPISLSSLPELVTDSPGIHDDCFLEREKFLRECAQMFTAPPRNNERNTRPFPRKFLNIVDPLKQSNNLGRSVSKGNFYRIRSAFDLGARKLGKILQVPANSIVDEVNQFFRSTLKRNLGRARPDVQGTAVNLNIERDNKGYPPLHSNPC…
TraesCS5B02G146200	TaNTP9B	MVDIDECSVALVPELEHALANPNPSSISPDAWAPFEAAALGVMCRIQPTVASEGRRAAVVDYIQRLVKCSVGCSVFPFGSVPLKTYLPDGDIDLAAFGYTCSDESLANEVRAILESEERRKDAEFEIKDVQYINAEVKLVKCFVQNIVVDISFNQIGGLYTLCFLEQVNQRFEKTHLFKRSIVLIKAWCYYESRILGAHHGLISTYALETLVLYIFHLFHESLDGPLAVLYRFLDYYSKFDWDNRGISLHGPISLSSLPELATDPPGIHNDCFLEREEFLRECAQMFTAPPRNYERNTRPFPRKFLNIVDPLKQSNNLGRSVSKGNFYRIRSAFDLGARKLGKILQVPANSIVDEVNQFFRSTLKRNLGRVRPDVQGTAVNLNIERDNKGYPPLHSNPC…
TraesCS5D02G145000	TaNTP9D	MVDIDECSVALVPELEHALANPDPSSIPPDAWAPFEAAALGVMCRIQPTVASEGRRAAVVDYIQRLVKCSVGCSVFPFGSVPLKTYLPDGDIDLAAFGYTCSDESLANEVRAILESEERREDAEFEIKDVQYINAEVKLVKCFVQNIVVDISFNQIGGLYTLCFLEQVDQRFEKTHLFKRSIVLIKAWCYYESRILGAHHGLISTYALETLVLYIFHLFHESLDGPLAVLYRFLDYYSKFDWDNRGISLHGPISLSSLPELVTDSSGIHDDCFLEREKFLRECAQMFTAPPRNNERNTRPFPRKFLNIVDPLKQSNNLGRSVSKGNFYRIRSAFDLGARKLGKILQVPASSIVDEVNQFFRSTLKRNLGRVRPDVQGTAVNLNIERDNKGYPPLHSNPC…
TraesCS6A02G067000	TaNTP10A	MAGGDAKPLAGGAFLRFLLPAPKPEPTPPARLAPPHCLVAPAQPDPPPGALPDERLFIVAPTRPAWLPPQPRPQPQHPFSVPPARRVHPAAGAARNAGRFAAGRGGQARRRAGDFAGSRARAGPDRRKAGGGLAVKANGGEAGAGDRRAAAAARREKRVWVAVERKGASGGSDADDPAAVGGGYAGGDEAGGSVEGEEQLEPDDGDGRRLGEELEDSLLIAGDQECHDSDGGQQSSENTMSQSNQSRRLQIRTHTGWMECRHDIGTFAPGLLSIYESLKPSEDHMSKQSRLIDSLTKSVSKEWPNAQLHLYGSCANSFGTSHSDVDVCLEIDIGTGSEVELLLRLAEILRGDNFDSVEAITSARVPIVRMLDAGSGFSCDICINNLLAVANTKLLKDYA…
TraesCSU02G117200	TaNTP10Un	MAGGDAKPLAGGAFLRFLLPSPKPEPTHPAPARLAPPHCLVAPPQPDPPPGALPDERLFIVAPTRPAWLPPQPRPPFPVPPARRVHPAAGAARNAGRFAAGRGGQARRRAGDFAGNRARAGPDRRKAGGGLAVKESGGEDRAGARLAAAAARREKRVWVAVERKGASGGSDADDQAAVGGGYAGGDEAGGSVEGEEQLEPDDGDGRRLGEELEDSLLIAGDQECHDSDGGQQSSENTMSQSNQSRRLQIRTHTGWMECRHDIGTFASSLLSIYESLKPSEEHMSKQSRLIDSLTKSVTKEWPNAQLHLYGSCANSFGTSHSDVDVCLEIEIGTGSEVELLLRLAEILRGDNFDSVEAITSARVPIVRMLDAGSDFSCDICINNLLAVANTKLLKDYAQI…
TraesCS7A02G280800	TaNTP11A	MASVTVTPLSAPEPEPSARPDNLPRPSVAISWDTQALCKHAETCELGSEAFLIDPALLPTLEGLLLETYAMLRPKPVEYEQRRTMIDVFNKIAKDIFGKKDDFPVVEPFGSFTMDLFTTKSDLDLSVNFSNDMDGQFARKDKISVIRKFAKVLHKHQSRGRCYGVLPVLSAIVPVLKVTDKGTGVECDISVENKDGMSRSMIFKLVSSIDERFQILCYLIKFWAKTHDVNCPKDRTMSSMAIISLVAFHLQTRHPPILPAFSGLLKDGADFASVQRNVVLFKGFGSTNKESVAELFVSLMSKLLAVKDLWEQGLCASNFDGFWISKTWNRGIGNLSVEDFLDRSQNFARSVGKVEMQNICECLKDTVSKLTDFFRGKIDAPTLKILIFGALNQDVPVSH…
TraesCS7B02G180400	TaNTP11B	MALVTVTPLSAPEPEPSARPDNLPRPSVAISWDTQALCKHAETCELGSEAFLIDPALLPTLEGLLLETYAMLRPKPVEYEQRRTMIDVFNKIAKDIFGKKDDFPVVEPFGSFTMDLFTTKSDLDLSVNFSNDMDGQFARKDKISVIRKFAKVLHKHQSRGRCYGVLPVLSAIVPVLKVTDKGTGVECDISVENKDGMSRSMIFKLVSSIDERFQILCYLMKFWAKTHDVNCPKDRTMSSMAIISLVAFHLQTRHPPILPAFSGLLKDGADFASVQRNVVLFKGFGSTNKESVAELFVSLMSKLLAVKDLWEQGLCASNFDGFWISKTWNRGIGNLSVEDFLDRSQNFARSVGKVEMQNICECLKDTVSKLTDFFRGKIDAPTLKILIFGALNQDVPVSH…
TraesCS7D02G279400	TaNTP11D	MASVTVTPLSAPEPEPSARPDNLPRPSVAISWDTQALCKHAETCELGSEAFLIDPALLPTLEGLLLETYAMLRPKPVEYEQRRTMIDVFNKIAKDIFGKKDDFPVVEPFGSFTMDLFTTKSDLDLSVNFSNDMDGQFARKDKISVIRKFAKVLHKHQSRGRCYGVLPVLSAIVPVLKVTDKGTGVECDISVENKDGMSRSMIFKLVSSIDERFQILCYLMKFWAKTHDVNCPKDRTMSSMAIISLVAFHLQTRHPPILPAFSGLLKDGADFASVQRNVVLFKGFGSTNKESVAELFVSLMSKLLAVKDLWEQGLCASNFDGFWISKTWNRGIGNLSVEDFLDRSQNFARSVGKVEMQNICECLKDTVSKLTDFFRGKIDALTLKILIFGALNQDVPVSH…
TraesCS7A02G471100	TaNTP12A	MIRERYLPFPSITIVFHQVRCAIFKTLASMNNKITLQGRYLPFSSITVVFHQVRRAIFRTLTSTNNKITLQSYQINETTHNSDFCFAQEEEPAKNHHCPACLTGWDQTRQKHGRRTTESDPKEKRKKNHTHILKRCGAVAPPHSRVPTGHRDTDTHTPRLRPTMAAASAAALASPRTARQLVDALTAHLSLYHAANPSSPSPSPSPSPSPTPRAAILRWLAALPPPARAAACTALLPPPAAAALLSMLRRLRLRGHSSFFVLADPAPTDPSSPTVLSRLSRGLLARAAAASRVHELLFARALLFTATPASHRPDAITLAEPLLADLDAFVAAMDEISGGAFLRAGDGEVDLAALASEEFPELPWLKAKGYYVIEEFVANWVEIALRMSWAAAAAGGGAG…
TraesCS7B02G373100	TaNTP12B	MDEISGGAFLRAGDGEVDLAALASEEFPELPWLKAKGYYVIEEFVANWVEIALRMSWAAAAAGGGVGGKKAVRVGRCVKEKAGLASTAFWREKGYVDWWMRLEPRVRARITGAFFGKSAKALANEIEGSDVASSDSGSFLADSMYGSTRQSFFRKNQPGCGDVASILSCKKKPAFAKELKRLLVLQEIVCLKSNITYCGGDAIFLTSLMSAGTVADNILMRLRRLLMVVSTESIKLELIGDGASNNPKKNVEKTSVGSRKGKKKSSSSKKLAASSKSSKDNGGSSTETRNSRIVSKSNQQTPSVRCTINGPASEETPCKEIAPIPKAEQAIRLADCNNQCNKKKNKRKGKAKLSDLLRAENPGPGKLKTAVAHVATEAFHKSPEAVDAPLCVPSHAHIS…
TraesCS7D02G458500	TaNTP12D	MPTISKSHTNSSSLQANEIEGSDVASSDSGSFLADSLYGSTRQSFFRKNQPGCGDVASILSCKKKPAFAKELKRLLVLQEIVCLKSNITCCGGDAIFLTSLMSAGTVADNILMRLRRLLMVVSMESINLELIGDGASNNPKKNVEKTSVGSRKGKKKSSSSKKLAASSKSSKDNGCSSTETRNSRIVSKSSQQTPSVRCTIIGPASEGTPCKEIAPVPKAEQAIRLADCNNQCNKKKNKRKGKAKLSDLMRAENPGPGKLKTAVAHVATEALHKSAEAVDAPLRVPSHVNTSSNDIPEAVGCSESSSIFDGTEEKGIKSSRKLEDTLCSSMVISSVTTECCQSAQKPANFSVNEQSPSHTSLNESMVQPSLCSPSSSDNVLSGNPCRNSADSLVRSAQD…

## Sheet: Table S3
Table S3a Collinearity relationship of TaNTP genes in wheat.				Table S3b Collinearity relationship between OsNTPs and TaNTPs			Table S3c Collinearity relationship between AtNTPs and TaNTPs
Gene pairs				Gene pairs			Gene pairs
	Gene name 1	Gene name 2		Gene name 1	Gene name 2		Gene name 1	Gene name 2
Subgenomic duplication	TaNTP1A	TaNTP1D		OsNTP2	TaNTP3A		AtHESO1	TaNTP4A
	TaNTP1B	TaNTP1D		OsNTP2	TaNTP3B		AtHESO1	TaNTP4D
	TaNTP2A	TaNTP2B		OsNTP2	TaNTP3D		AtNTP2	TaNTP9A
	TaNTP3A	TaNTP3B		OsNTP3	TaNTP4A
	TaNTP3A	TaNTP3D		OsNTP3	TaNTP4D
	TaNTP3B	TaNTP3D		OsNTP4	TaNTP10A
	TaNTP4A	TaNTP4B		OsNTP4	TaNTP10Un
	TaNTP4A	TaNTP4D		OsNTP5	TaNTP5A
	TaNTP4B	TaNTP4D		OsNTP5	TaNTP5B
	TaNTP5A	TaNTP5B		OsNTP6	TaNTP2A
	TaNTP6A	TaNTP6B		OsNTP6	TaNTP2B
	TaNTP6A	TaNTP6D		OsNTP6	TaNTP6A
	TaNTP6B	TaNTP6D		OsNTP6	TaNTP6B
	TaNTP7A	TaNTP7B		OsNTP6	TaNTP6D
	TaNTP7A	TaNTP7D		OsNTP7	TaNTP12A
	TaNTP8A	TaNTP8B		OsNTP8	TaNTP2A
	TaNTP8A	TaNTP8D		OsNTP8	TaNTP2B
	TaNTP8B	TaNTP8D		OsNTP9	TaNTP11A
	TaNTP9A	TaNTP9B		OsNTP9	TaNTP11B
	TaNTP9A	TaNTP9D		OsNTP9	TaNTP11D
	TaNTP9B	TaNTP9D		OsNTP9	TaNTP7D
	TaNTP10A	TaNTP10Un		OsNTP11	TaNTP8A
	TaNTP11A	TaNTP11B		OsNTP11	TaNTP8B
	TaNTP11A	TaNTP11D		OsNTP11	TaNTP8D
	TaNTP11D	TaNTP11B		OsNTP11	TaNTP9A
	TaNTP12A	TaNTP12B		OsNTP11	TaNTP9B
	TaNTP12A	TaNTP12D		OsNTP11	TaNTP9D
	TaNTP12D	TaNTP12B		OsNTP12	TaNTP8A
Fragment duplication	TaNTP2A	TaNTP6B		OsNTP12	TaNTP8B
	TaNTP2A	TaNTP6D		OsNTP12	TaNTP8D
	TaNTP2A	TaNTP9A		OsNTP12	TaNTP9A
	TaNTP2A	TaNTP9B		OsNTP12	TaNTP9B
	TaNTP2A	TaNTP9D		OsNTP12	TaNTP9D
	TaNTP2B	TaNTP6A
	TaNTP2B	TaNTP6B
	TaNTP2B	TaNTP6D
	TaNTP2B	TaNTP9A
	TaNTP2B	TaNTP9B
	TaNTP2B	TaNTP9D
	TaNTP8A	TaNTP9A
	TaNTP8A	TaNTP9B
	TaNTP8A	TaNTP9D
	TaNTP8B	TaNTP9A
	TaNTP8B	TaNTP9B
	TaNTP8B	TaNTP9D
	TaNTP8D	TaNTP9A
	TaNTP8D	TaNTP9B
	TaNTP8D	TaNTP9D

## Sheet: Table S4
Table S4 The values of Ka/Ks between collinear gene pairs
Gene name_1	Gene name_2	Ka	Ks	Ka/Ks
OsNTP11	TaNTP9D	0.225603	0.661318	0.341141
OsNTP11	TaNTP9B	0.225305	0.656503	0.34319
OsNTP2	TaNTP3D	0.111305	0.640992	0.173644
OsNTP2	TaNTP3B	0.118647	0.640137	0.185346
OsNTP2	TaNTP3A	0.120915	0.642811	0.188104
OsNTP3	TaNTP4D	0.213667	0.575737	0.371119
OsNTP3	TaNTP4A	0.214024	0.549536	0.389463
OsNTP4	TaNTP10A	0.116766	0.693723	0.168318
OsNTP4	TaNTP10Un	0.120446	0.597708	0.201513
OsNTP5	TaNTP5A	0.181372	0.464666	0.390327
OsNTP5	TaNTP5B	0.186631	0.436261	0.427797
OsNTP6	TaNTP2B	0.515727	2.56557	0.201018
OsNTP6	TaNTP2A	0.627209	2.9416	0.21322
OsNTP6	TaNTP6A	0.302872	0.667231	0.453924
OsNTP6	TaNTP6D	0.291952	0.635754	0.459222
OsNTP6	TaNTP6B	0.293951	0.590291	0.497976
OsNTP7	TaNTP12A	0.0812066	0.542512	0.149686
OsNTP8	TaNTP2A	0.682091	2.64009	0.258359
OsNTP8	TaNTP2B	0.671213	2.08814	0.32144
OsNTP9	TaNTP7D	0.331798	1.36719	0.242686
OsNTP9	TaNTP11A	0.204539	0.604968	0.338099
OsNTP9	TaNTP11D	0.202311	0.572552	0.353351
OsNTP9	TaNTP11B	0.202421	0.566697	0.357194
OsNTP11	TaNTP9A	0.224971	0.639651	0.351709
OsNTP11	TaNTP8D	0.208551	0.555921	0.375145
OsNTP11	TaNTP8A	0.209009	0.54757	0.381702
OsNTP11	TaNTP8B	0.215036	0.560615	0.383572
OsNTP12	TaNTP9B	0.217581	0.670879	0.324322
OsNTP12	TaNTP9D	0.218756	0.660903	0.330996
OsNTP12	TaNTP9A	0.218001	0.632148	0.344858
OsNTP12	TaNTP8D	0.200377	0.564498	0.354965
OsNTP12	TaNTP8A	0.200183	0.554434	0.361059
OsNTP12	TaNTP8B	0.207294	0.569925	0.363723
TaNTP1A	TaNTP1D	0.00792575	0.019162	0.413618
TaNTP1B	TaNTP1D	0.0164674	0.0388722	0.423629
TaNTP2A	TaNTP6D	0.535111	2.985	0.179266
TaNTP2A	TaNTP2B	0.0359496	0.117291	0.3065
TaNTP2B	TaNTP6B	0.521967	6.90858	0.0755534
TaNTP2B	TaNTP9B	0.575969	3.58973	0.160449
TaNTP2B	TaNTP6D	0.53192	3.10892	0.171095
TaNTP3A	TaNTP3D	0.0154346	0.082451	0.187198
TaNTP3A	TaNTP3B	0.0170099	0.0904125	0.188137
TaNTP3B	TaNTP3D	0.00764484	0.0552204	0.138442
TaNTP4A	TaNTP4D	0.021567	0.0596266	0.361701
TaNTP4A	TaNTP4B	0.322415	0.71436	0.451334
TaNTP4B	TaNTP4D	0.343566	0.746884	0.459999
TaNTP5A	TaNTP5B	0.0098432	0.0489697	0.201006
TaNTP6A	TaNTP6D	0.0149948	0.0636204	0.235692
TaNTP6A	TaNTP6B	0.0186755	0.0523692	0.356613
TaNTP6B	TaNTP6D	0.0223913	0.058895	0.38019
TaNTP7A	TaNTP7D	0.0299696	0.120065	0.249611
TaNTP7A	TaNTP7B	0.0346485	0.101242	0.342233
TaNTP8A	TaNTP8D	0.00697243	0.040899	0.170479
TaNTP8A	TaNTP9B	0.169638	0.492724	0.344286
TaNTP8A	TaNTP8B	0.0145527	0.0420383	0.346178
TaNTP8A	TaNTP9D	0.176347	0.466283	0.378197
TaNTP8A	TaNTP9A	0.176516	0.457293	0.386001
TaNTP8B	TaNTP8D	0.0139613	0.039924	0.349696
TaNTP8B	TaNTP9B	0.174851	0.484138	0.361159
TaNTP8B	TaNTP9D	0.186021	0.470339	0.395503
TaNTP8B	TaNTP9A	0.186201	0.461259	0.403681
TaNTP8D	TaNTP9B	0.175422	0.478679	0.36647
TaNTP8D	TaNTP9D	0.182147	0.45643	0.399069
TaNTP8D	TaNTP9A	0.182322	0.444138	0.410507
TaNTP9A	TaNTP9B	0.016287	0.0356385	0.457004
TaNTP9A	TaNTP9D	0.00838458	0.0136656	0.613554
TaNTP9B	TaNTP9D	0.0162731	0.0459761	0.353946
TaNTP10A	TaNTP10Un	0.0166937	0.111291	0.15
TaNTP11A	TaNTP11D	0.00385209	0.0291556	0.132122
TaNTP11A	TaNTP11B	0.0038511	0.0237905	0.161875
TaNTP11D	TaNTP11B	0.0015359	0.0104486	0.146996
TaNTP12A	TaNTP12B	0.0133055	0.0690142	0.192794
TaNTP12A	TaNTP12D	0.0133055	0.0690142	0.192794

## Sheet: Table S5
Table S5 The promoter analysis of TaNTPs
Gene name	Cis-element site		Description
	Start	End
TaNTP1A	-1974	-1954	MeJA responsiveness
TaNTP1A	-636	-616	MeJA responsiveness
TaNTP1A	-1976	-1956	abscisic acid responsiveness
TaNTP1A	-1918	-1898	abscisic acid responsiveness
TaNTP1A	-1916	-1896	abscisic acid responsiveness
TaNTP1A	-1888	-1868	abscisic acid responsiveness
TaNTP1A	-1472	-1452	abscisic acid responsiveness
TaNTP1A	-1212	-1192	abscisic acid responsiveness
TaNTP1A	-573	-553	abscisic acid responsiveness
TaNTP1A	-468	-448	gibberellin responsiveness
TaNTP1A	-372	-352	drought responsiveness
TaNTP1A	-922	-902	auxin responsiveness
TaNTP1B	-1904	-1884	anaerobic induction
TaNTP1B	-1900	-1880	low-temperature responsiveness
TaNTP1B	-81	-61	low-temperature responsiveness
TaNTP1B	-1741	-1721	drought responsiveness
TaNTP1B	-922	-902	drought responsiveness
TaNTP1B	-880	-860	drought responsiveness
TaNTP1B	-836	-816	drought responsiveness
TaNTP1B	-819	-799	drought responsiveness
TaNTP1B	-813	-793	drought responsiveness
TaNTP1B	-732	-712	drought responsiveness
TaNTP1B	-682	-662	drought responsiveness
TaNTP1B	-591	-571	drought responsiveness
TaNTP1B	-449	-429	drought responsiveness
TaNTP1B	-419	-399	drought responsiveness
TaNTP1B	-1991	-1971	abscisic acid responsiveness
TaNTP1B	-1990	-1970	abscisic acid responsiveness
TaNTP1B	-1938	-1918	abscisic acid responsiveness
TaNTP1B	-1603	-1583	abscisic acid responsiveness
TaNTP1B	-1257	-1237	abscisic acid responsiveness
TaNTP1B	-1232	-1212	abscisic acid responsiveness
TaNTP1B	-1205	-1185	abscisic acid responsiveness
TaNTP1B	-1204	-1184	abscisic acid responsiveness
TaNTP1B	-1155	-1135	abscisic acid responsiveness
TaNTP1B	-1154	-1134	abscisic acid responsiveness
TaNTP1B	-1127	-1107	abscisic acid responsiveness
TaNTP1B	-947	-927	abscisic acid responsiveness
TaNTP1B	-946	-926	abscisic acid responsiveness
TaNTP1B	-601	-581	abscisic acid responsiveness
TaNTP1B	-558	-538	abscisic acid responsiveness
TaNTP1B	-555	-535	abscisic acid responsiveness
TaNTP1B	-386	-366	abscisic acid responsiveness
TaNTP1B	-227	-207	abscisic acid responsiveness
TaNTP1B	-186	-166	gibberellin responsiveness
TaNTP1B	-1259	-1239	MeJA responsiveness
TaNTP1B	-105	-85	MeJA responsiveness
TaNTP1D	-1833	-1813	abscisic acid responsiveness
TaNTP1D	-1831	-1811	abscisic acid responsiveness
TaNTP1D	-1830	-1810	abscisic acid responsiveness
TaNTP1D	-1729	-1709	abscisic acid responsiveness
TaNTP1D	-1356	-1336	abscisic acid responsiveness
TaNTP1D	-1353	-1333	abscisic acid responsiveness
TaNTP1D	-920	-900	abscisic acid responsiveness
TaNTP1D	-1678	-1658	gibberellin responsiveness
TaNTP1D	-496	-476	MeJA responsiveness
TaNTP1D	-159	-139	MeJA responsiveness
TaNTP1D	-859	-839	auxin responsiveness
TaNTP1D	-680	-660	auxin responsiveness
TaNTP1D	-626	-606	auxin responsiveness
TaNTP1D	-572	-552	auxin responsiveness
TaNTP1D	-417	-397	low-temperature responsiveness
TaNTP1D	-690	-670	anaerobic induction
TaNTP1D	-663	-643	auxin responsiveness
TaNTP1D	-1947	-1927	salicylic acid responsiveness
TaNTP1D	-1574	-1554	salicylic acid responsiveness
TaNTP2A	-1828	-1808	MeJA responsiveness
TaNTP2A	-1709	-1689	MeJA responsiveness
TaNTP2A	-1703	-1683	MeJA responsiveness
TaNTP2A	-1679	-1659	MeJA responsiveness
TaNTP2A	-1608	-1588	MeJA responsiveness
TaNTP2A	-1577	-1557	MeJA responsiveness
TaNTP2A	-1343	-1323	MeJA responsiveness
TaNTP2A	-182	-162	MeJA responsiveness
TaNTP2A	-1906	-1886	gibberellin responsiveness
TaNTP2A	-1216	-1196	gibberellin responsiveness
TaNTP2A	-1775	-1755	low-temperature responsiveness
TaNTP2A	-1858	-1838	auxin responsiveness
TaNTP2A	-1373	-1353	auxin responsiveness
TaNTP2A	-1837	-1817	defense and stress responsiveness
TaNTP2A	-1825	-1805	abscisic acid responsiveness
TaNTP2A	-1824	-1804	abscisic acid responsiveness
TaNTP2A	-1574	-1554	abscisic acid responsiveness
TaNTP2A	-1573	-1553	abscisic acid responsiveness
TaNTP2A	-1428	-1408	abscisic acid responsiveness
TaNTP2A	-198	-178	abscisic acid responsiveness
TaNTP2A	-142	-122	abscisic acid responsiveness
TaNTP2A	-1967	-1947	anaerobic induction
TaNTP2A	-1716	-1696	anaerobic induction
TaNTP2A	-1186	-1166	anaerobic induction
TaNTP2A	-1127	-1107	anaerobic induction
TaNTP2B	-1571	-1551	auxin responsiveness
TaNTP2B	-1455	-1435	auxin responsiveness
TaNTP2B	-1606	-1586	low-temperature responsiveness
TaNTP2B	-1374	-1354	low-temperature responsiveness
TaNTP2B	-787	-767	low-temperature responsiveness
TaNTP2B	-1987	-1967	anaerobic induction
TaNTP2B	-1965	-1945	anaerobic induction
TaNTP2B	-1796	-1776	anaerobic induction
TaNTP2B	-1138	-1118	anaerobic induction
TaNTP2B	-1939	-1919	MeJA responsiveness
TaNTP2B	-1789	-1769	MeJA responsiveness
TaNTP2B	-1659	-1639	MeJA responsiveness
TaNTP2B	-1425	-1405	MeJA responsiveness
TaNTP2B	-81	-61	MeJA responsiveness
TaNTP2B	-1905	-1885	abscisic acid responsiveness
TaNTP2B	-1904	-1884	abscisic acid responsiveness
TaNTP2B	-1510	-1490	abscisic acid responsiveness
TaNTP2B	-197	-177	abscisic acid responsiveness
TaNTP2B	-142	-122	abscisic acid responsiveness
TaNTP3A	-1724	-1704	anaerobic induction
TaNTP3A	-1068	-1048	anaerobic induction
TaNTP3A	-970	-950	anaerobic induction
TaNTP3A	-939	-919	anaerobic induction
TaNTP3A	-623	-603	anaerobic induction
TaNTP3A	-1223	-1203	auxin responsiveness
TaNTP3A	-354	-334	auxin responsiveness
TaNTP3A	-657	-637	gibberellin responsiveness
TaNTP3A	-1676	-1656	gibberellin responsiveness
TaNTP3A	-1493	-1473	abscisic acid responsiveness
TaNTP3A	-1492	-1472	abscisic acid responsiveness
TaNTP3A	-1272	-1252	abscisic acid responsiveness
TaNTP3A	-1035	-1015	abscisic acid responsiveness
TaNTP3A	-769	-749	abscisic acid responsiveness
TaNTP3A	-741	-721	abscisic acid responsiveness
TaNTP3A	-442	-422	abscisic acid responsiveness
TaNTP3A	-440	-420	abscisic acid responsiveness
TaNTP3A	-439	-419	abscisic acid responsiveness
TaNTP3A	-1024	-1004	defense and stress responsiveness
TaNTP3A	-167	-147	defense and stress responsiveness
TaNTP3A	-572	-552	drought responsiveness
TaNTP3B	-568	-548	auxin responsiveness
TaNTP3B	-1475	-1455	drought responsiveness
TaNTP3B	-1463	-1443	drought responsiveness
TaNTP3B	-1424	-1404	drought responsiveness
TaNTP3B	-717	-697	drought responsiveness
TaNTP3B	-1634	-1614	MeJA responsiveness
TaNTP3B	-982	-962	MeJA responsiveness
TaNTP3B	-648	-628	MeJA responsiveness
TaNTP3B	-688	-668	abscisic acid responsiveness
TaNTP3B	-646	-626	abscisic acid responsiveness
TaNTP3D	-728	-708	drought responsiveness
TaNTP3D	-161	-141	drought responsiveness
TaNTP3D	-769	-749	abscisic acid responsiveness
TaNTP3D	-554	-534	abscisic acid responsiveness
TaNTP3D	-1058	-1038	auxin responsiveness
TaNTP4A	-111	-91	anaerobic induction
TaNTP4A	-1973	-1953	abscisic acid responsiveness
TaNTP4A	-1765	-1745	abscisic acid responsiveness
TaNTP4A	-1698	-1678	abscisic acid responsiveness
TaNTP4A	-1697	-1677	abscisic acid responsiveness
TaNTP4A	-117	-97	defense and stress responsiveness
TaNTP4A	-904	-884	gibberellin responsiveness
TaNTP4A	-1709	-1689	gibberellin responsiveness
TaNTP4A	-1763	-1743	MeJA responsiveness
TaNTP4A	-1599	-1579	MeJA responsiveness
TaNTP4A	-1926	-1906	drought responsiveness
TaNTP4B	-1560	-1540	low-temperature responsiveness
TaNTP4B	-1340	-1320	anaerobic induction
TaNTP4B	-702	-682	anaerobic induction
TaNTP4B	-515	-495	anaerobic induction
TaNTP4B	-387	-367	anaerobic induction
TaNTP4B	-1875	-1855	abscisic acid responsiveness
TaNTP4B	-1531	-1511	abscisic acid responsiveness
TaNTP4B	-846	-826	abscisic acid responsiveness
TaNTP4B	-234	-214	abscisic acid responsiveness
TaNTP4B	-233	-213	abscisic acid responsiveness
TaNTP4B	-49	-29	abscisic acid responsiveness
TaNTP4B	-1964	-1944	defense and stress responsiveness
TaNTP4B	-415	-395	gibberellin responsiveness
TaNTP4B	-1877	-1857	MeJA responsiveness
TaNTP4B	-1331	-1311	MeJA responsiveness
TaNTP4B	-1015	-995	MeJA responsiveness
TaNTP4B	-978	-958	MeJA responsiveness
TaNTP4B	-904	-884	MeJA responsiveness
TaNTP4B	-637	-617	MeJA responsiveness
TaNTP4B	-258	-238	MeJA responsiveness
TaNTP4D	-872	-852	gibberellin responsiveness
TaNTP4D	-116	-96	defense and stress responsiveness
TaNTP4D	-1892	-1872	abscisic acid responsiveness
TaNTP4D	-1558	-1538	anaerobic induction
TaNTP5A	-1636	-1616	low-temperature responsiveness
TaNTP5A	-882	-862	abscisic acid responsiveness
TaNTP5A	-615	-595	abscisic acid responsiveness
TaNTP5A	-1653	-1633	MeJA responsiveness
TaNTP5A	-1627	-1607	MeJA responsiveness
TaNTP5A	-1126	-1106	MeJA responsiveness
TaNTP5B	-1590	-1570	anaerobic induction
TaNTP5B	-1211	-1191	anaerobic induction
TaNTP5B	-1197	-1177	gibberellin responsiveness
TaNTP5B	-1225	-1205	defense and stress responsiveness
TaNTP5B	-1144	-1124	abscisic acid responsiveness
TaNTP5B	-1141	-1121	abscisic acid responsiveness
TaNTP5B	-1140	-1120	abscisic acid responsiveness
TaNTP5B	-796	-776	abscisic acid responsiveness
TaNTP5B	-1895	-1875	MeJA responsiveness
TaNTP5D	-1679	-1659	MeJA responsiveness
TaNTP5D	-998	-978	abscisic acid responsiveness
TaNTP5D	-663	-643	abscisic acid responsiveness
TaNTP5D	-1048	-1028	low-temperature responsiveness
TaNTP6A	-1390	-1370	salicylic acid responsiveness
TaNTP6A	-591	-571	anaerobic induction
TaNTP6A	-1670	-1650	MeJA responsiveness
TaNTP6A	-1632	-1612	MeJA responsiveness
TaNTP6A	-1350	-1330	MeJA responsiveness
TaNTP6A	-1898	-1878	abscisic acid responsiveness
TaNTP6A	-1897	-1877	abscisic acid responsiveness
TaNTP6A	-1630	-1610	abscisic acid responsiveness
TaNTP6A	-1514	-1494	abscisic acid responsiveness
TaNTP6A	-1311	-1291	auxin responsiveness
TaNTP6A	-1875	-1855	drought responsiveness
TaNTP6A	-580	-560	drought responsiveness
TaNTP6B	-1621	-1601	MeJA responsiveness
TaNTP6B	-1549	-1529	MeJA responsiveness
TaNTP6B	-914	-894	MeJA responsiveness
TaNTP6B	-1398	-1378	gibberellin responsiveness
TaNTP6B	-1257	-1237	gibberellin responsiveness
TaNTP6B	-1539	-1519	abscisic acid responsiveness
TaNTP6B	-1054	-1034	abscisic acid responsiveness
TaNTP6B	-895	-875	abscisic acid responsiveness
TaNTP6B	-1520	-1500	low-temperature responsiveness
TaNTP6B	-904	-884	low-temperature responsiveness
TaNTP6B	-1775	-1755	auxin responsiveness
TaNTP6D	-1200	-1180	drought responsiveness
TaNTP6D	-1059	-1039	drought responsiveness
TaNTP6D	-1830	-1810	MeJA responsiveness
TaNTP6D	-581	-561	MeJA responsiveness
TaNTP6D	-1788	-1768	abscisic acid responsiveness
TaNTP6D	-727	-707	abscisic acid responsiveness
TaNTP6D	-562	-542	abscisic acid responsiveness
TaNTP6D	-1089	-1069	gibberellin responsiveness
TaNTP6D	-948	-928	gibberellin responsiveness
TaNTP6D	-1386	-1366	gibberellin responsiveness
TaNTP6D	-952	-932	salicylic acid responsiveness
TaNTP6D	-1305	-1285	anaerobic induction
TaNTP6D	-571	-551	low-temperature responsiveness
TaNTP7A	-881	-861	drought responsiveness
TaNTP7A	-796	-776	drought responsiveness
TaNTP7A	-646	-626	drought responsiveness
TaNTP7A	-592	-572	drought responsiveness
TaNTP7A	-1642	-1622	abscisic acid responsiveness
TaNTP7A	-1641	-1621	abscisic acid responsiveness
TaNTP7A	-1759	-1739	anaerobic induction
TaNTP7A	-1357	-1337	anaerobic induction
TaNTP7A	-1029	-1009	anaerobic induction
TaNTP7A	-970	-950	anaerobic induction
TaNTP7A	-417	-397	anaerobic induction
TaNTP7A	-392	-372	low-temperature responsiveness
TaNTP7A	-1347	-1327	salicylic acid responsiveness
TaNTP7B	-1659	-1639	auxin responsiveness
TaNTP7B	-1093	-1073	salicylic acid responsiveness
TaNTP7B	-366	-346	salicylic acid responsiveness
TaNTP7B	-410	-390	low-temperature responsiveness
TaNTP7B	-1940	-1920	anaerobic induction
TaNTP7B	-1511	-1491	anaerobic induction
TaNTP7B	-658	-638	anaerobic induction
TaNTP7B	-595	-575	anaerobic induction
TaNTP7B	-449	-429	anaerobic induction
TaNTP7B	-1630	-1610	abscisic acid responsiveness
TaNTP7B	-1395	-1375	abscisic acid responsiveness
TaNTP7B	-1394	-1374	abscisic acid responsiveness
TaNTP7B	-264	-244	auxin responsiveness
TaNTP7D	-1154	-1134	auxin responsiveness
TaNTP7D	-1087	-1067	drought responsiveness
TaNTP7D	-904	-884	drought responsiveness
TaNTP7D	-635	-615	drought responsiveness
TaNTP7D	-290	-270	drought responsiveness
TaNTP7D	-1882	-1862	abscisic acid responsiveness
TaNTP7D	-1881	-1861	abscisic acid responsiveness
TaNTP7D	-439	-419	abscisic acid responsiveness
TaNTP7D	-1277	-1257	anaerobic induction
TaNTP7D	-541	-521	anaerobic induction
TaNTP7D	-1579	-1559	salicylic acid responsiveness
TaNTP8A	-1114	-1094	abscisic acid responsiveness
TaNTP8A	-422	-402	abscisic acid responsiveness
TaNTP8A	-291	-271	abscisic acid responsiveness
TaNTP8A	-97	-77	abscisic acid responsiveness
TaNTP8A	-86	-66	abscisic acid responsiveness
TaNTP8A	-57	-37	abscisic acid responsiveness
TaNTP8A	-56	-36	abscisic acid responsiveness
TaNTP8A	-1965	-1945	MeJA responsiveness
TaNTP8A	-1361	-1341	MeJA responsiveness
TaNTP8A	-1205	-1185	MeJA responsiveness
TaNTP8A	-420	-400	MeJA responsiveness
TaNTP8A	-411	-391	MeJA responsiveness
TaNTP8A	-294	-274	MeJA responsiveness
TaNTP8A	-740	-720	drought responsiveness
TaNTP8A	-1577	-1557	anaerobic induction
TaNTP8A	-895	-875	anaerobic induction
TaNTP8A	-887	-867	anaerobic induction
TaNTP8B	-834	-814	low-temperature responsiveness
TaNTP8B	-1082	-1062	salicylic acid responsiveness
TaNTP8B	-568	-548	salicylic acid responsiveness
TaNTP8B	-1130	-1110	drought responsiveness
TaNTP8B	-744	-724	drought responsiveness
TaNTP8B	-1687	-1667	abscisic acid responsiveness
TaNTP8B	-962	-942	abscisic acid responsiveness
TaNTP8B	-424	-404	abscisic acid responsiveness
TaNTP8B	-287	-267	abscisic acid responsiveness
TaNTP8B	-1145	-1125	MeJA responsiveness
TaNTP8B	-964	-944	MeJA responsiveness
TaNTP8B	-422	-402	MeJA responsiveness
TaNTP8B	-413	-393	MeJA responsiveness
TaNTP8B	-290	-270	MeJA responsiveness
TaNTP8D	-1396	-1376	abscisic acid responsiveness
TaNTP8D	-1379	-1359	abscisic acid responsiveness
TaNTP8D	-1070	-1050	abscisic acid responsiveness
TaNTP8D	-1069	-1049	abscisic acid responsiveness
TaNTP8D	-432	-412	abscisic acid responsiveness
TaNTP8D	-52	-32	abscisic acid responsiveness
TaNTP8D	-751	-731	drought responsiveness
TaNTP8D	-898	-878	salicylic acid responsiveness
TaNTP8D	-572	-552	salicylic acid responsiveness
TaNTP8D	-905	-885	anaerobic induction
TaNTP8D	-1724	-1704	MeJA responsiveness
TaNTP8D	-1398	-1378	MeJA responsiveness
TaNTP8D	-1381	-1361	MeJA responsiveness
TaNTP8D	-1225	-1205	MeJA responsiveness
TaNTP8D	-1222	-1202	MeJA responsiveness
TaNTP8D	-430	-410	MeJA responsiveness
TaNTP8D	-421	-401	MeJA responsiveness
TaNTP8D	-308	-288	MeJA responsiveness
TaNTP8D	-949	-929	auxin responsiveness
TaNTP9A	-1335	-1315	MeJA responsiveness
TaNTP9A	-1023	-1003	abscisic acid responsiveness
TaNTP9A	-1022	-1002	abscisic acid responsiveness
TaNTP9A	-916	-896	gibberellin responsiveness
TaNTP9A	-704	-684	gibberellin responsiveness
TaNTP9A	-767	-747	auxin responsiveness
TaNTP9B	-1355	-1335	low-temperature responsiveness
TaNTP9B	-1363	-1343	auxin responsiveness
TaNTP9B	-1411	-1391	drought responsiveness
TaNTP9B	-1882	-1862	MeJA responsiveness
TaNTP9B	-1403	-1383	MeJA responsiveness
TaNTP9B	-828	-808	MeJA responsiveness
TaNTP9B	-1049	-1029	gibberellin responsiveness
TaNTP9B	-1118	-1098	abscisic acid responsiveness
TaNTP9B	-1117	-1097	abscisic acid responsiveness
TaNTP9D	-1876	-1856	MeJA responsiveness
TaNTP9D	-1839	-1819	MeJA responsiveness
TaNTP9D	-1431	-1411	MeJA responsiveness
TaNTP9D	-1056	-1036	abscisic acid responsiveness
TaNTP9D	-1054	-1034	abscisic acid responsiveness
TaNTP9D	-1053	-1033	abscisic acid responsiveness
TaNTP9D	-1078	-1058	gibberellin responsiveness
TaNTP9D	-1391	-1371	auxin responsiveness
TaNTP9D	-1929	-1909	drought responsiveness
TaNTP9D	-1596	-1576	drought responsiveness
TaNTP9D	-1439	-1419	drought responsiveness
TaNTP9D	-754	-734	salicylic acid responsiveness
TaNTP9D	-1383	-1363	low-temperature responsiveness
TaNTP10A	-1197	-1177	MeJA responsiveness
TaNTP10A	-437	-417	MeJA responsiveness
TaNTP10A	-1208	-1188	abscisic acid responsiveness
TaNTP10A	-1206	-1186	abscisic acid responsiveness
TaNTP10A	-1205	-1185	abscisic acid responsiveness
TaNTP10A	-955	-935	abscisic acid responsiveness
TaNTP10A	-954	-934	abscisic acid responsiveness
TaNTP10A	-894	-874	abscisic acid responsiveness
TaNTP10A	-893	-873	abscisic acid responsiveness
TaNTP10A	-433	-413	abscisic acid responsiveness
TaNTP10A	-431	-411	abscisic acid responsiveness
TaNTP10A	-430	-410	abscisic acid responsiveness
TaNTP10A	-103	-83	abscisic acid responsiveness
TaNTP10A	-1903	-1883	anaerobic induction
TaNTP10A	-1679	-1659	anaerobic induction
TaNTP10A	-1604	-1584	anaerobic induction
TaNTP10A	-1563	-1543	anaerobic induction
TaNTP10A	-1545	-1525	anaerobic induction
TaNTP10A	-689	-669	anaerobic induction
TaNTP10A	-882	-862	salicylic acid responsiveness
TaNTP10Un	-1229	-1209	anaerobic induction
TaNTP10Un	-475	-455	anaerobic induction
TaNTP10Un	-1327	-1307	abscisic acid responsiveness
TaNTP10Un	-668	-648	abscisic acid responsiveness
TaNTP10Un	-458	-438	abscisic acid responsiveness
TaNTP10Un	-457	-437	abscisic acid responsiveness
TaNTP10Un	-101	-81	abscisic acid responsiveness
TaNTP10Un	-1775	-1755	MeJA responsiveness
TaNTP10Un	-452	-432	auxin responsiveness
TaNTP11A	-875	-855	low-temperature responsiveness
TaNTP11A	-1114	-1094	anaerobic induction
TaNTP11A	-472	-452	anaerobic induction
TaNTP11A	-1137	-1117	MeJA responsiveness
TaNTP11A	-1010	-990	MeJA responsiveness
TaNTP11A	-126	-106	MeJA responsiveness
TaNTP11A	-1105	-1085	drought responsiveness
TaNTP11A	-723	-703	drought responsiveness
TaNTP11A	-534	-514	drought responsiveness
TaNTP11B	-1655	-1635	auxin responsiveness
TaNTP11B	-736	-716	auxin responsiveness
TaNTP11B	-1886	-1866	anaerobic induction
TaNTP11B	-1144	-1124	anaerobic induction
TaNTP11B	-504	-484	anaerobic induction
TaNTP11B	-189	-169	anaerobic induction
TaNTP11B	-1864	-1844	drought responsiveness
TaNTP11B	-1745	-1725	auxin responsiveness
TaNTP11B	-1651	-1631	abscisic acid responsiveness
TaNTP11B	-1219	-1199	abscisic acid responsiveness
TaNTP11B	-584	-564	MeJA responsiveness
TaNTP11B	-126	-106	MeJA responsiveness
TaNTP11D	-1878	-1858	MeJA responsiveness
TaNTP11D	-1515	-1495	MeJA responsiveness
TaNTP11D	-199	-179	MeJA responsiveness
TaNTP11D	-112	-92	MeJA responsiveness
TaNTP11D	-1913	-1893	abscisic acid responsiveness
TaNTP11D	-1513	-1493	abscisic acid responsiveness
TaNTP11D	-1508	-1488	abscisic acid responsiveness
TaNTP11D	-1448	-1428	abscisic acid responsiveness
TaNTP11D	-1232	-1212	abscisic acid responsiveness
TaNTP11D	-1183	-1163	abscisic acid responsiveness
TaNTP11D	-1161	-1141	abscisic acid responsiveness
TaNTP11D	-1122	-1102	abscisic acid responsiveness
TaNTP11D	-1120	-1100	abscisic acid responsiveness
TaNTP11D	-1688	-1668	gibberellin responsiveness
TaNTP11D	-990	-970	gibberellin responsiveness
TaNTP11D	-816	-796	salicylic acid responsiveness
TaNTP11D	-389	-369	low-temperature responsiveness
TaNTP11D	-294	-274	low-temperature responsiveness
TaNTP11D	-153	-133	low-temperature responsiveness
TaNTP11D	-1774	-1754	anaerobic induction
TaNTP12A	-1921	-1901	abscisic acid responsiveness
TaNTP12A	-1918	-1898	abscisic acid responsiveness
TaNTP12A	-1880	-1860	abscisic acid responsiveness
TaNTP12A	-1438	-1418	abscisic acid responsiveness
TaNTP12A	-291	-271	abscisic acid responsiveness
TaNTP12A	-753	-733	defense and stress responsiveness
TaNTP12A	-1982	-1962	MeJA responsiveness
TaNTP12A	-1958	-1938	MeJA responsiveness
TaNTP12A	-1164	-1144	MeJA responsiveness
TaNTP12A	-293	-273	MeJA responsiveness
TaNTP12A	-1272	-1252	auxin responsiveness
TaNTP12A	-1176	-1156	auxin responsiveness
TaNTP12A	-190	-170	auxin responsiveness
TaNTP12A	-1321	-1301	anaerobic induction
TaNTP12A	-1015	-995	anaerobic induction
TaNTP12A	-842	-822	anaerobic induction
TaNTP12A	-543	-523	anaerobic induction
TaNTP12B	-929	-909	salicylic acid responsiveness
TaNTP12B	-1754	-1734	auxin responsiveness
TaNTP12B	-1905	-1885	anaerobic induction
TaNTP12B	-1890	-1870	anaerobic induction
TaNTP12B	-1321	-1301	low-temperature responsiveness
TaNTP12B	-1622	-1602	drought responsiveness
TaNTP12B	-1454	-1434	abscisic acid responsiveness
TaNTP12B	-869	-849	abscisic acid responsiveness
TaNTP12B	-896	-876	gibberellin responsiveness
TaNTP12B	-911	-891	gibberellin responsiveness
TaNTP12D	-1748	-1728	drought responsiveness
TaNTP12D	-1442	-1422	drought responsiveness
TaNTP12D	-1655	-1635	MeJA responsiveness
TaNTP12D	-864	-844	MeJA responsiveness
TaNTP12D	-1770	-1750	abscisic acid responsiveness
TaNTP12D	-1358	-1338	anaerobic induction
TaNTP12D	-488	-468	anaerobic induction
TaNTP12D	-469	-449	anaerobic induction
TaNTP12D	-422	-402	anaerobic induction

## Sheet: Table S6
Table S6a Interacting proteins of single TaNTPs				Table S6b The total of 26 interacting proteins
TaNTPs name	Interaction proteins			Gene ID	Protein ID	Annotation
	Gene ID	Protein ID		TraesCS1A02G149200	A0A3B5XZ03	Eukaryotic translation initiation factor isoform 4E-2
TaNTP1A	TraesCS3B02G345100	A0A077RV03		TraesCS1A02G149300	A0A3B5XXT8	Cellulose synthase A catalytic subunit 7
	TraesCS3A02G320700	A0A3B6EJG4		TraesCS1B02G167200	A0A3B5YVA1	Cellulose synthase A catalytic subunit 7
	TraesCS3D02G310600	A0A3B6H066		TraesCS2A02G154400	A0A3B6AUC3	DExH-box ATP-dependent RNA helicase DExH10
	TraesCS4A02G265500	A0A3B6HW47		TraesCS2A02G423400	A0A3B6B350	Uncharacterized protein
	TraesCS5A02G212600	A0A3B6KJA0		TraesCS2B02G442800	A0A3B6CBH1	Uncharacterized protein
	TraesCS5B02G211100	A0A3B6LMH5		TraesCS2D02G159900	A0A2X0TJ32	DExH-box ATP-dependent RNA helicase DExH10
	TraesCS5D02G219400	A0A3B6MQI9		TraesCS2D02G421100	A0A1D6RNT4	Uncharacterized protein
	TraesCS7A02G318800	A0A3B6RKL2		TraesCS3A02G320700	A0A3B6EJG4	Small RNA degrading nuclease 5
	TraesCS7B02G219700	A0A3B6SEH9		TraesCS3B02G345100	A0A077RV03	Small RNA degrading nuclease 5
	TraesCS7D02G315400	A0A3B6TFZ7		TraesCS3B02G411300	D8L9L9_WHEAT	bZIP transcription factor 12
TaNTP1B	TraesCS3B02G345100	A0A077RV03		TraesCS3D02G310600	A0A3B6H066	Small RNA degrading nuclease 5
	TraesCS3A02G320700	A0A3B6EJG4		TraesCS3D02G371900	A0A3B6H1X8	bZIP transcription factor 12
	TraesCS3D02G310600	A0A3B6H066		TraesCS4A02G181200	A0A3B6HVE4	Uncharacterized protein
	TraesCS4A02G265500	A0A3B6HW47		TraesCS4A02G265500	A0A3B6HW47	Uncharacterized protein
	TraesCS5A02G212600	A0A3B6KJA0		TraesCS4A02G484300	A0A3B6I7E4	DExH-box ATP-dependent RNA helicase DExH9
	TraesCS5B02G211100	A0A3B6LMH5		TraesCS5A02G212600	A0A3B6KJA0	DNA cross-link repair 1A protein
	TraesCS5D02G219400	A0A3B6MQI9		TraesCS5A02G424900	A0A3B6KNY1	Uncharacterized protein
	TraesCS7A02G318800	A0A3B6RKL2		TraesCS5B02G211100	A0A3B6LMH5	DNA cross-link repair 1A protein
	TraesCS7B02G219700	A0A3B6SEH9		TraesCS5B02G426900	A0A3B6LUD7	Uncharacterized protein
	TraesCS7D02G315400	A0A3B6TFZ7		TraesCS5D02G219400	A0A3B6MQI9	DNA cross-link repair 1A protein
TaNTP1D	TraesCS3B02G345100	A0A077RV03		TraesCS7A02G010800	A0A3B6RAC9	DExH-box ATP-dependent RNA helicase DExH9
	TraesCS3A02G320700	A0A3B6EJG4		TraesCS7A02G318800	A0A3B6RKL2	Squamous cell carcinoma antigen recognized by T-cells 3
	TraesCS3D02G310600	A0A3B6H066		TraesCS7B02G219700	A0A3B6SEH9	Squamous cell carcinoma antigen recognized by T-cells 3
	TraesCS4A02G265500	A0A3B6HW47		TraesCS7D02G010500	A0A3B6TGG7	DExH-box ATP-dependent RNA helicase DExH9
	TraesCS5A02G212600	A0A3B6KJA0		TraesCS7D02G315400	A0A3B6TFZ7	Squamous cell carcinoma antigen recognized by T-cells 3
	TraesCS5B02G211100	A0A3B6LMH5
	TraesCS5D02G219400	A0A3B6MQI9
	TraesCS7A02G318800	A0A3B6RKL2
	TraesCS7B02G219700	A0A3B6SEH9
	TraesCS7D02G315400	A0A3B6TFZ7
TaNTP2A	TraesCS2D02G421100	A0A1D6RNT4
	TraesCS2D02G159900	A0A2X0TJ32
	TraesCS2A02G154400	A0A3B6AUC3
	TraesCS2A02G423400	A0A3B6B350
	TraesCS2B02G442800	A0A3B6CBH1
	TraesCS3D02G371900	A0A3B6H1X8
	TraesCS4A02G181200	A0A3B6HVE4
	TraesCS5A02G424900	A0A3B6KNY1
	TraesCS5B02G426900	A0A3B6LUD7
	TraesCS3B02G411300	D8L9L9_WHEAT
TaNTP2B	TraesCS2D02G421100	A0A1D6RNT4
	TraesCS2D02G159900	A0A2X0TJ32
	TraesCS2A02G154400	A0A3B6AUC3
	TraesCS2A02G423400	A0A3B6B350
	TraesCS2B02G442800	A0A3B6CBH1
	TraesCS3D02G371900	A0A3B6H1X8
	TraesCS4A02G181200	A0A3B6HVE4
	TraesCS5A02G424900	A0A3B6KNY1
	TraesCS5B02G426900	A0A3B6LUD7
	TraesCS3B02G411300	D8L9L9_WHEAT
TaNTP3A	TraesCS2D02G421100	A0A1D6RNT4
	TraesCS2A02G423400	A0A3B6B350
	TraesCS2B02G442800	A0A3B6CBH1
	TraesCS3D02G371900	A0A3B6H1X8
	TraesCS4A02G181200	A0A3B6HVE4
	TraesCS4A02G484300	A0A3B6I7E4
	TraesCS5A02G424900	A0A3B6KNY1
	TraesCS5B02G426900	A0A3B6LUD7
	TraesCS7A02G010800	A0A3B6RAC9
	TraesCS7D02G010500	A0A3B6TGG7
TaNTP3B	TraesCS2D02G421100	A0A1D6RNT4
	TraesCS2A02G423400	A0A3B6B350
	TraesCS2B02G442800	A0A3B6CBH1
	TraesCS3D02G371900	A0A3B6H1X8
	TraesCS4A02G181200	A0A3B6HVE4
	TraesCS4A02G484300	A0A3B6I7E4
	TraesCS5A02G424900	A0A3B6KNY1
	TraesCS5B02G426900	A0A3B6LUD7
	TraesCS7A02G010800	A0A3B6RAC9
	TraesCS7D02G010500	A0A3B6TGG7
TaNTP3D	TraesCS2D02G421100	A0A1D6RNT4
	TraesCS2A02G423400	A0A3B6B350
	TraesCS2B02G442800	A0A3B6CBH1
	TraesCS3D02G371900	A0A3B6H1X8
	TraesCS4A02G181200	A0A3B6HVE4
	TraesCS4A02G484300	A0A3B6I7E4
	TraesCS5A02G424900	A0A3B6KNY1
	TraesCS5B02G426900	A0A3B6LUD7
	TraesCS7A02G010800	A0A3B6RAC9
	TraesCS7D02G010500	A0A3B6TGG7
TaNTP4A	TraesCS3B02G345100	A0A077RV03
	TraesCS3A02G320700	A0A3B6EJG4
	TraesCS3D02G310600	A0A3B6H066
	TraesCS4A02G265500	A0A3B6HW47
	TraesCS5A02G212600	A0A3B6KJA0
	TraesCS5B02G211100	A0A3B6LMH5
	TraesCS5D02G219400	A0A3B6MQI9
	TraesCS7A02G318800	A0A3B6RKL2
	TraesCS7B02G219700	A0A3B6SEH9
	TraesCS7D02G315400	A0A3B6TFZ7
TaNTP4B	TraesCS3B02G345100	A0A077RV03
	TraesCS3A02G320700	A0A3B6EJG4
	TraesCS3D02G310600	A0A3B6H066
	TraesCS4A02G265500	A0A3B6HW47
	TraesCS5A02G212600	A0A3B6KJA0
	TraesCS5B02G211100	A0A3B6LMH5
	TraesCS5D02G219400	A0A3B6MQI9
	TraesCS7A02G318800	A0A3B6RKL2
	TraesCS7B02G219700	A0A3B6SEH9
	TraesCS7D02G315400	A0A3B6TFZ7
TaNTP4D	TraesCS3B02G345100	A0A077RV03
	TraesCS3A02G320700	A0A3B6EJG4
	TraesCS3D02G310600	A0A3B6H066
	TraesCS4A02G265500	A0A3B6HW47
	TraesCS5A02G212600	A0A3B6KJA0
	TraesCS5B02G211100	A0A3B6LMH5
	TraesCS5D02G219400	A0A3B6MQI9
	TraesCS7A02G318800	A0A3B6RKL2
	TraesCS7B02G219700	A0A3B6SEH9
	TraesCS7D02G315400	A0A3B6TFZ7
TaNTP5A	TraesCS2D02G421100	A0A1D6RNT4
	TraesCS2D02G159900	A0A2X0TJ32
	TraesCS2A02G154400	A0A3B6AUC3
	TraesCS2A02G423400	A0A3B6B350
	TraesCS2B02G442800	A0A3B6CBH1
	TraesCS3D02G371900	A0A3B6H1X8
	TraesCS4A02G181200	A0A3B6HVE4
	TraesCS5A02G424900	A0A3B6KNY1
	TraesCS5B02G426900	A0A3B6LUD7
	TraesCS3B02G411300	D8L9L9_WHEAT
TaNTP5B	TraesCS2D02G421100	A0A1D6RNT4
	TraesCS2D02G159900	A0A2X0TJ32
	TraesCS2A02G154400	A0A3B6AUC3
	TraesCS2A02G423400	A0A3B6B350
	TraesCS2B02G442800	A0A3B6CBH1
	TraesCS3D02G371900	A0A3B6H1X8
	TraesCS4A02G181200	A0A3B6HVE4
	TraesCS5A02G424900	A0A3B6KNY1
	TraesCS5B02G426900	A0A3B6LUD7
	TraesCS3B02G411300	D8L9L9_WHEAT
TaNTP5D	TraesCS2D02G421100	A0A1D6RNT4
	TraesCS2D02G159900	A0A2X0TJ32
	TraesCS2A02G154400	A0A3B6AUC3
	TraesCS2A02G423400	A0A3B6B350
	TraesCS2B02G442800	A0A3B6CBH1
	TraesCS3D02G371900	A0A3B6H1X8
	TraesCS4A02G181200	A0A3B6HVE4
	TraesCS5A02G424900	A0A3B6KNY1
	TraesCS5B02G426900	A0A3B6LUD7
	TraesCS3B02G411300	D8L9L9_WHEAT
TaNTP6A	TraesCS2D02G421100	A0A1D6RNT4
	TraesCS2D02G159900	A0A2X0TJ32
	TraesCS2A02G154400	A0A3B6AUC3
	TraesCS2A02G423400	A0A3B6B350
	TraesCS2B02G442800	A0A3B6CBH1
	TraesCS3D02G371900	A0A3B6H1X8
	TraesCS4A02G181200	A0A3B6HVE4
	TraesCS5A02G424900	A0A3B6KNY1
	TraesCS5B02G426900	A0A3B6LUD7
	TraesCS3B02G411300	D8L9L9_WHEAT
TaNTP6B	TraesCS2D02G421100	A0A1D6RNT4
	TraesCS2D02G159900	A0A2X0TJ32
	TraesCS2A02G154400	A0A3B6AUC3
	TraesCS2A02G423400	A0A3B6B350
	TraesCS2B02G442800	A0A3B6CBH1
	TraesCS3D02G371900	A0A3B6H1X8
	TraesCS4A02G181200	A0A3B6HVE4
	TraesCS5A02G424900	A0A3B6KNY1
	TraesCS5B02G426900	A0A3B6LUD7
	TraesCS3B02G411300	D8L9L9_WHEAT
TaNTP6D	TraesCS2D02G421100	A0A1D6RNT4
	TraesCS2D02G159900	A0A2X0TJ32
	TraesCS2A02G154400	A0A3B6AUC3
	TraesCS2A02G423400	A0A3B6B350
	TraesCS2B02G442800	A0A3B6CBH1
	TraesCS3D02G371900	A0A3B6H1X8
	TraesCS4A02G181200	A0A3B6HVE4
	TraesCS5A02G424900	A0A3B6KNY1
	TraesCS5B02G426900	A0A3B6LUD7
	TraesCS3B02G411300	D8L9L9_WHEAT
TaNTP7A	TraesCS1A02G149300	A0A3B5XXT8
	TraesCS1A02G149200	A0A3B5XZ03
	TraesCS1B02G167200	A0A3B5YVA1
	TraesCS4A02G265500	A0A3B6HW47
	TraesCS5A02G212600	A0A3B6KJA0
	TraesCS5B02G211100	A0A3B6LMH5
	TraesCS5D02G219400	A0A3B6MQI9
	TraesCS7A02G318800	A0A3B6RKL2
	TraesCS7B02G219700	A0A3B6SEH9
	TraesCS7D02G315400	A0A3B6TFZ7
TaNTP7B	TraesCS1A02G149300	A0A3B5XXT8
	TraesCS1A02G149200	A0A3B5XZ03
	TraesCS1B02G167200	A0A3B5YVA1
	TraesCS4A02G265500	A0A3B6HW47
	TraesCS5A02G212600	A0A3B6KJA0
	TraesCS5B02G211100	A0A3B6LMH5
	TraesCS5D02G219400	A0A3B6MQI9
	TraesCS7A02G318800	A0A3B6RKL2
	TraesCS7B02G219700	A0A3B6SEH9
	TraesCS7D02G315400	A0A3B6TFZ7
TaNTP7D	TraesCS1A02G149300	A0A3B5XXT8
	TraesCS1A02G149200	A0A3B5XZ03
	TraesCS1B02G167200	A0A3B5YVA1
	TraesCS4A02G265500	A0A3B6HW47
	TraesCS5A02G212600	A0A3B6KJA0
	TraesCS5B02G211100	A0A3B6LMH5
	TraesCS5D02G219400	A0A3B6MQI9
	TraesCS7A02G318800	A0A3B6RKL2
	TraesCS7B02G219700	A0A3B6SEH9
	TraesCS7D02G315400	A0A3B6TFZ7
TaNTP8A	TraesCS2D02G421100	A0A1D6RNT4
	TraesCS2D02G159900	A0A2X0TJ32
	TraesCS2A02G154400	A0A3B6AUC3
	TraesCS2A02G423400	A0A3B6B350
	TraesCS2B02G442800	A0A3B6CBH1
	TraesCS3D02G371900	A0A3B6H1X8
	TraesCS4A02G181200	A0A3B6HVE4
	TraesCS5A02G424900	A0A3B6KNY1
	TraesCS5B02G426900	A0A3B6LUD7
	TraesCS3B02G411300	D8L9L9_WHEAT
TaNTP8B	TraesCS2D02G421100	A0A1D6RNT4
	TraesCS2D02G159900	A0A2X0TJ32
	TraesCS2A02G154400	A0A3B6AUC3
	TraesCS2A02G423400	A0A3B6B350
	TraesCS2B02G442800	A0A3B6CBH1
	TraesCS3D02G371900	A0A3B6H1X8
	TraesCS4A02G181200	A0A3B6HVE4
	TraesCS5A02G424900	A0A3B6KNY1
	TraesCS5B02G426900	A0A3B6LUD7
	TraesCS3B02G411300	D8L9L9_WHEAT
TaNTP8D	TraesCS2D02G421100	A0A1D6RNT4
	TraesCS2D02G159900	A0A2X0TJ32
	TraesCS2A02G154400	A0A3B6AUC3
	TraesCS2A02G423400	A0A3B6B350
	TraesCS2B02G442800	A0A3B6CBH1
	TraesCS3D02G371900	A0A3B6H1X8
	TraesCS4A02G181200	A0A3B6HVE4
	TraesCS5A02G424900	A0A3B6KNY1
	TraesCS5B02G426900	A0A3B6LUD7
	TraesCS3B02G411300	D8L9L9_WHEAT
TaNTP9A	TraesCS2D02G421100	A0A1D6RNT4
	TraesCS2D02G159900	A0A2X0TJ32
	TraesCS2A02G154400	A0A3B6AUC3
	TraesCS2A02G423400	A0A3B6B350
	TraesCS2B02G442800	A0A3B6CBH1
	TraesCS3D02G371900	A0A3B6H1X8
	TraesCS4A02G181200	A0A3B6HVE4
	TraesCS5A02G424900	A0A3B6KNY1
	TraesCS5B02G426900	A0A3B6LUD7
	TraesCS3B02G411300	D8L9L9_WHEAT
TaNTP9B	TraesCS2D02G421100	A0A1D6RNT4
	TraesCS2D02G159900	A0A2X0TJ32
	TraesCS2A02G154400	A0A3B6AUC3
	TraesCS2A02G423400	A0A3B6B350
	TraesCS2B02G442800	A0A3B6CBH1
	TraesCS3D02G371900	A0A3B6H1X8
	TraesCS4A02G181200	A0A3B6HVE4
	TraesCS5A02G424900	A0A3B6KNY1
	TraesCS5B02G426900	A0A3B6LUD7
	TraesCS3B02G411300	D8L9L9_WHEAT
TaNTP9D	TraesCS2D02G421100	A0A1D6RNT4
	TraesCS2D02G159900	A0A2X0TJ32
	TraesCS2A02G154400	A0A3B6AUC3
	TraesCS2A02G423400	A0A3B6B350
	TraesCS2B02G442800	A0A3B6CBH1
	TraesCS3D02G371900	A0A3B6H1X8
	TraesCS4A02G181200	A0A3B6HVE4
	TraesCS5A02G424900	A0A3B6KNY1
	TraesCS5B02G426900	A0A3B6LUD7
	TraesCS3B02G411300	D8L9L9_WHEAT
TaNTP10A	TraesCS3B02G345100	A0A077RV03
	TraesCS3A02G320700	A0A3B6EJG4
	TraesCS3D02G310600	A0A3B6H066
	TraesCS4A02G265500	A0A3B6HW47
	TraesCS5A02G212600	A0A3B6KJA0
	TraesCS5B02G211100	A0A3B6LMH5
	TraesCS5D02G219400	A0A3B6MQI9
	TraesCS7A02G318800	A0A3B6RKL2
	TraesCS7B02G219700	A0A3B6SEH9
	TraesCS7D02G315400	A0A3B6TFZ7
TaNTP10Un	TraesCS3B02G345100	A0A077RV03
	TraesCS3A02G320700	A0A3B6EJG4
	TraesCS3D02G310600	A0A3B6H066
	TraesCS4A02G265500	A0A3B6HW47
	TraesCS5A02G212600	A0A3B6KJA0
	TraesCS5B02G211100	A0A3B6LMH5
	TraesCS5D02G219400	A0A3B6MQI9
	TraesCS7A02G318800	A0A3B6RKL2
	TraesCS7B02G219700	A0A3B6SEH9
	TraesCS7D02G315400	A0A3B6TFZ7
TaNTP11A	TraesCS1A02G149300	A0A3B5XXT8
	TraesCS1A02G149200	A0A3B5XZ03
	TraesCS1B02G167200	A0A3B5YVA1
	TraesCS4A02G265500	A0A3B6HW47
	TraesCS5A02G212600	A0A3B6KJA0
	TraesCS5B02G211100	A0A3B6LMH5
	TraesCS5D02G219400	A0A3B6MQI9
	TraesCS7A02G318800	A0A3B6RKL2
	TraesCS7B02G219700	A0A3B6SEH9
	TraesCS7D02G315400	A0A3B6TFZ7
TaNTP11B	TraesCS1A02G149300	A0A3B5XXT8
	TraesCS1A02G149200	A0A3B5XZ03
	TraesCS1B02G167200	A0A3B5YVA1
	TraesCS4A02G265500	A0A3B6HW47
	TraesCS5A02G212600	A0A3B6KJA0
	TraesCS5B02G211100	A0A3B6LMH5
	TraesCS5D02G219400	A0A3B6MQI9
	TraesCS7A02G318800	A0A3B6RKL2
	TraesCS7B02G219700	A0A3B6SEH9
	TraesCS7D02G315400	A0A3B6TFZ7
TaNTP11D	TraesCS1A02G149300	A0A3B5XXT8
	TraesCS1A02G149200	A0A3B5XZ03
	TraesCS1B02G167200	A0A3B5YVA1
	TraesCS4A02G265500	A0A3B6HW47
	TraesCS5A02G212600	A0A3B6KJA0
	TraesCS5B02G211100	A0A3B6LMH5
	TraesCS5D02G219400	A0A3B6MQI9
	TraesCS7A02G318800	A0A3B6RKL2
	TraesCS7B02G219700	A0A3B6SEH9
	TraesCS7D02G315400	A0A3B6TFZ7
TaNTP12A	TraesCS2D02G421100	A0A1D6RNT4
	TraesCS2A02G423400	A0A3B6B350
	TraesCS2B02G442800	A0A3B6CBH1
	TraesCS3D02G371900	A0A3B6H1X8
	TraesCS4A02G181200	A0A3B6HVE4
	TraesCS4A02G484300	A0A3B6I7E4
	TraesCS5A02G424900	A0A3B6KNY1
	TraesCS5B02G426900	A0A3B6LUD7
	TraesCS7A02G010800	A0A3B6RAC9
	TraesCS7D02G010500	A0A3B6TGG7
TaNTP12B	TraesCS2D02G421100	A0A1D6RNT4
	TraesCS2A02G423400	A0A3B6B350
	TraesCS2B02G442800	A0A3B6CBH1
	TraesCS3D02G371900	A0A3B6H1X8
	TraesCS4A02G181200	A0A3B6HVE4
	TraesCS4A02G484300	A0A3B6I7E4
	TraesCS5A02G424900	A0A3B6KNY1
	TraesCS5B02G426900	A0A3B6LUD7
	TraesCS7A02G010800	A0A3B6RAC9
	TraesCS7D02G010500	A0A3B6TGG7
TaNTP12D	TraesCS2D02G421100	A0A1D6RNT4
	TraesCS2A02G423400	A0A3B6B350
	TraesCS2B02G442800	A0A3B6CBH1
	TraesCS3D02G371900	A0A3B6H1X8
	TraesCS4A02G181200	A0A3B6HVE4
	TraesCS4A02G484300	A0A3B6I7E4
	TraesCS5A02G424900	A0A3B6KNY1
	TraesCS5B02G426900	A0A3B6LUD7
	TraesCS7A02G010800	A0A3B6RAC9
	TraesCS7D02G010500	A0A3B6TGG7

## Sheet: Table S7
Table S7 GO enrichment analysis of interaction proteins
GO term	Description	P-value	Group	GeneID
GO:0000460	maturation of 5.8S rRNA	8.53e-14	biological_process	TraesCS2A02G154400/TraesCS2D02G159900/TraesCS4A02G484300/TraesCS7A02G010800/TraesCS7D02G010500
GO:0006401	RNA catabolic process	3.58e-12	biological_process	TraesCS2A02G154400/TraesCS2D02G159900/TraesCS4A02G484300/TraesCS7A02G010800/TraesCS7D02G010500
GO:0000715	nucleotide-excision repair, DNA damage recognition	3.24e-10	biological_process	TraesCS5A02G212600/TraesCS5B02G211100/TraesCS5D02G219400
GO:0048872	homeostasis of number of cells	3.24e-10	biological_process	TraesCS7A02G318800/TraesCS7B02G219700/TraesCS7D02G315400
GO:0000244	spliceosomal tri-snRNP complex assembly	5.89e-08	biological_process	TraesCS7A02G318800/TraesCS7B02G219700/TraesCS7D02G315400
GO:0000902	cell morphogenesis	2.13e-07	biological_process	TraesCS7A02G318800/TraesCS7B02G219700/TraesCS7D02G315400
GO:0000381	regulation of alternative mRNA splicing, via spliceosome	6.36e-06	biological_process	TraesCS7A02G318800/TraesCS7B02G219700/TraesCS7D02G315400
GO:0060149	negative regulation of posttranscriptional gene silencing	1.73e-05	biological_process	TraesCS2A02G154400/TraesCS2D02G159900
GO:0010093	specification of floral organ identity	4.79e-05	biological_process	TraesCS2A02G154400/TraesCS2D02G159900
GO:0006334	nucleosome assembly	0.000112	biological_process	TraesCS7A02G318800/TraesCS7B02G219700/TraesCS7D02G315400
GO:0010468	regulation of gene expression	0.000149	biological_process	TraesCS7A02G318800/TraesCS7B02G219700/TraesCS7D02G315400
GO:0009833	plant-type primary cell wall biogenesis	0.000308	biological_process	TraesCS1A02G149300/TraesCS1B02G167200
GO:1902584	positive regulation of response to water deprivation	0.000418	biological_process	TraesCS3B02G411300/TraesCS3D02G371900
GO:1901002	positive regulation of response to salt stress	0.000537	biological_process	TraesCS3B02G411300/TraesCS3D02G371900
GO:0009789	positive regulation of abscisic acid-activated signaling pathway	0.00069	biological_process	TraesCS3B02G411300/TraesCS3D02G371900
GO:0030244	cellulose biosynthetic process	0.00119	biological_process	TraesCS1A02G149300/TraesCS1B02G167200
GO:0009834	plant-type secondary cell wall biogenesis	0.0013	biological_process	TraesCS1A02G149300/TraesCS1B02G167200
GO:0050687	negative regulation of defense response to virus	0.00243	biological_process	TraesCS1A02G149200
GO:0045893	positive regulation of transcription, DNA-templated	0.031	biological_process	TraesCS3B02G411300/TraesCS3D02G371900
GO:0009615	response to virus	0.0382	biological_process	TraesCS1A02G149200
GO:0005654	nucleoplasm	2.92e-16	cellular_component	TraesCS2A02G154400/TraesCS2D02G159900/TraesCS4A02G484300/TraesCS5A02G212600/TraesCS5B02G211100/TraesCS5D02G219400/TraesCS7A02G010800/TraesCS7A02G318800/TraesCS7B02G219700/TraesCS7D02G010500/TraesCS7D02G315400
GO:0061574	ASAP complex	4.88e-09	cellular_component	TraesCS7A02G318800/TraesCS7B02G219700/TraesCS7D02G315400
GO:0000784	nuclear chromosome, telomeric region	1.36e-06	cellular_component	TraesCS5A02G212600/TraesCS5B02G211100/TraesCS5D02G219400
GO:0016281	eukaryotic translation initiation factor 4F complex	0.00829	cellular_component	TraesCS1A02G149200
GO:0005802	trans-Golgi network	0.0215	cellular_component	TraesCS1A02G149300/TraesCS1B02G167200
GO:0030621	U4 snRNA binding	2.01e-09	molecular_function	TraesCS7A02G318800/TraesCS7B02G219700/TraesCS7D02G315400
GO:1990381	ubiquitin-specific protease binding	1.34e-08	molecular_function	TraesCS7A02G318800/TraesCS7B02G219700/TraesCS7D02G315400
GO:0003724	RNA helicase activity	3.45e-08	molecular_function	TraesCS2A02G154400/TraesCS2D02G159900/TraesCS4A02G484300/TraesCS7A02G010800/TraesCS7D02G010500
GO:0035312	5'-3' exodeoxyribonuclease activity	6.99e-08	molecular_function	TraesCS5A02G212600/TraesCS5B02G211100/TraesCS5D02G219400
GO:0004527	exonuclease activity	2.18e-07	molecular_function	TraesCS3A02G320700/TraesCS3B02G345100/TraesCS3D02G310600
GO:0003684	damaged DNA binding	5.07e-06	molecular_function	TraesCS5A02G212600/TraesCS5B02G211100/TraesCS5D02G219400
GO:0042393	histone binding	5.28e-05	molecular_function	TraesCS7A02G318800/TraesCS7B02G219700/TraesCS7D02G315400
GO:0016759	cellulose synthase activity	9.43e-05	molecular_function	TraesCS1A02G149300/TraesCS1B02G167200
GO:0000340	RNA 7-methylguanosine cap binding	0.00456	molecular_function	TraesCS1A02G149200
